# Supplementary material for: Information gaps in indigenous and local knowledge for science-policy assessments
Source: Springer Nature journal article supplement (doi:10.1038/s41893-019-0324-0), 2019-07-08
Supplement: MOESM1 [file 41893_2019_324_MOESM1_ESM.pdf]

In the format provided by the authors and unedited.

# Information gaps in indigenous and local knowledge for science-policy assessments

Rodrigo Cámara-Leret <sup>1\*</sup> and Zoe Dennehy<sup>1,2</sup>

---

<sup>1</sup>Identification & Naming Department, Royal Botanic Gardens Kew, Richmond, UK. <sup>2</sup>University of Sussex, Brighton, UK. \*e-mail: [R.CamaraLeret@kew.org](mailto:R.CamaraLeret@kew.org)

## **Supplementary Information**

### **Information gaps in Indigenous and Local Knowledge for Science-Policy Assessments**

Rodrigo Cámara-Leret<sup>1\*</sup> & Zoe Dennehy<sup>1,2</sup>

This file includes:

Supplementary Figure 1

Supplementary Tables 1 to 2

a

Habitat (Pajmans 1976):

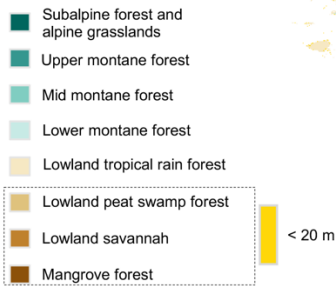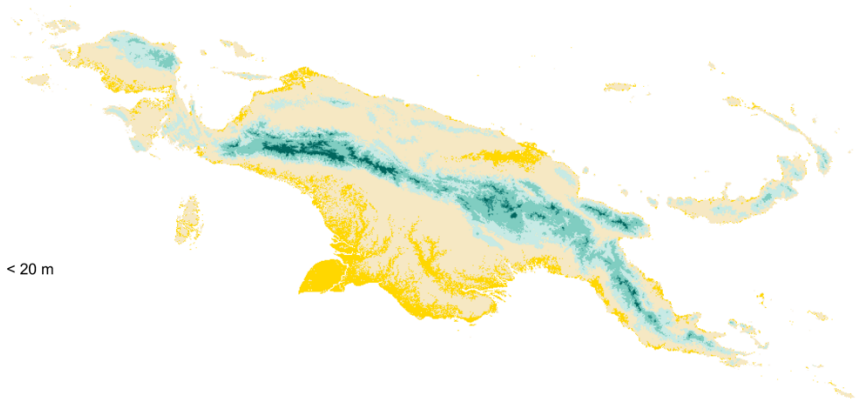

b

WWF Ecoregions (simplified)

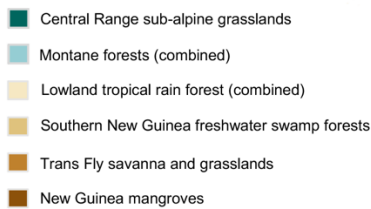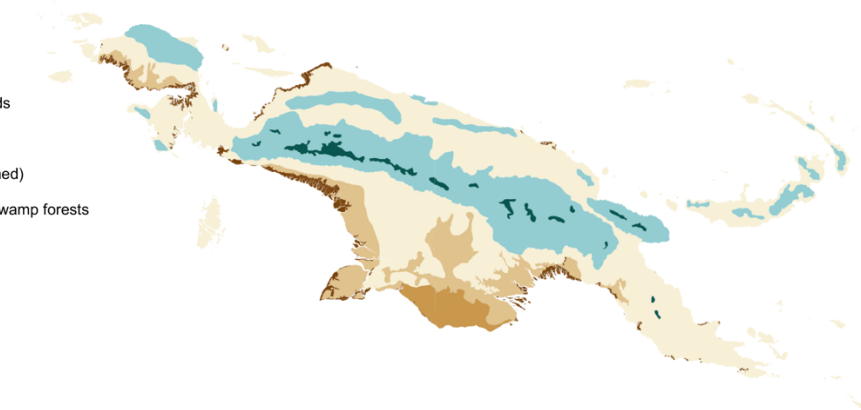

c

| WWF Ecoregion                                                 | Area (km <sup>2</sup> ) | % Study area of WWF ecoregion           | Habitat (Pajmans 1976)                                    | % Study area of Pajmans (1976) habitats   |                                         |
|---------------------------------------------------------------|-------------------------|-----------------------------------------|-----------------------------------------------------------|-------------------------------------------|-----------------------------------------|
| New Guinea mangroves                                          | 26,708                  | 3                                       | 1. Mangrove forest                                        | 13                                        |                                         |
| Trans Fly savanna and grasslands                              | 26,618                  | 3                                       | 2. Lowland savannah                                       |                                           |                                         |
| Southern New Guinea freshwater swamp forests                  | 99,493                  | 11                                      | 3. Lowland peat swamp forest                              | 52                                        |                                         |
| Louisiade Archipelago rain forests                            | 1608                    | 55                                      | 4. Lowland tropical rain forest                           |                                           |                                         |
| Southeastern Papuan rain forests                              | 77,034                  |                                         | 4. Lowland tropical rain forest                           |                                           |                                         |
| Yapen rain forests                                            | 2407                    |                                         | 4. Lowland tropical rain forest                           |                                           |                                         |
| New Britain-New Ireland lowland rain forests                  | 34,916                  |                                         | 4. Lowland tropical rain forest                           |                                           |                                         |
| Vogelkop-Aru lowland rain forests                             | 77,060                  |                                         | 4. Lowland tropical rain forest                           |                                           |                                         |
| Admiralty Islands lowland rain forests                        | 2099                    |                                         | 4. Lowland tropical rain forest                           |                                           |                                         |
| Trobriand Islands rain forests                                | 4180                    |                                         | 4. Lowland tropical rain forest                           |                                           |                                         |
| Biak-Numfoor rain forests                                     | 2810                    |                                         | 4. Lowland tropical rain forest                           |                                           |                                         |
| Southern New Guinea lowland rain forests                      | 122,338                 |                                         | 4. Lowland tropical rain forest                           |                                           |                                         |
| Vogelkop montane rain forests                                 | 21,851                  |                                         | 4. Lowland tropical rain forest                           |                                           |                                         |
| Northern New Guinea lowland rain and freshwater swamp forests | 134,636                 |                                         | 4. Lowland tropical rain forest/Lowland peat swamp forest |                                           |                                         |
| New Britain-New Ireland montane rain forests                  | 12,081                  |                                         | 26                                                        |                                           | 5. 6. 7. Lower/Mid/Upper montan forests |
| Northern New Guinea montane rain forests                      | 23,184                  |                                         |                                                           | 5. 6. 7. Lower/Mid/Upper montan forests   |                                         |
| Central Range montane rain forests                            | 171,230                 | 5. 6. 7. Lower/Mid/Upper montan forests |                                                           |                                           |                                         |
| Huon Peninsula montane rain forests                           | 16,450                  | 5. 6. 7. Lower/Mid/Upper montan forests |                                                           |                                           |                                         |
| Central Range sub-alpine grasslands                           | 15,503                  | 2                                       |                                                           | 8. Subalpine forest and alpine grasslands | 1                                       |
| <b>Total Area</b>                                             | <b>872,206</b>          |                                         |                                                           |                                           |                                         |

**Supplementary Figure 1. Percent of study area occupied by each habitat. a**, Habitat area calculated using elevation<sup>41</sup>, or using **b**, WWF ecoregions<sup>42</sup>. For details, see Methods.

**Supplementary Table 1.** ILK about the services provided by New Guinea's habitats.

| <b>Habitat</b>                                  | <b># Use Reports</b> | <b># Uses</b> | <b># Families</b> | <b># Genera</b> | <b># Species</b> | <b># Indigenous groups</b> | <b># References</b> |
|-------------------------------------------------|----------------------|---------------|-------------------|-----------------|------------------|----------------------------|---------------------|
| Mangrove forest (sea level)                     | 907                  | 647           | 38                | 69              | 87               | 13                         | 33                  |
| Lowland savannah (sea level)                    | 90                   | 75            | 32                | 51              | 42               | 3                          | 4                   |
| Lowland peat swamp forest (sea level)           | 247                  | 105           | 40                | 70              | 69               | 9                          | 14                  |
| Lowland tropical rainforest (0-500 m)           | 9782                 | 7765          | 184               | 736             | 1552             | 90                         | 173                 |
| Lower montane forest (500-1500 m)               | 12626                | 8176          | 205               | 799             | 1668             | 44                         | 139                 |
| Mid montane forest (1500-2800 m)                | 9716                 | 5409          | 192               | 684             | 1346             | 46                         | 118                 |
| Upper montane forest (2800-3200 m)              | 772                  | 676           | 63                | 83              | 134              | 13                         | 48                  |
| Subalpine forest and alpine grasslands (>3200m) | 533                  | 483           | 37                | 41              | 79               | 9                          | 30                  |

## Supplementary Table 2. List of the 488 references reviewed in this study.

- 1 Abdillahi et al. 2010. Ethnobotany, phytochemistry and pharmacology of *Podocarpus sensu latissimo* (s.l.). *South African Journal of Botany* 76: 1-10.
- 2 Adema et al. 1994. *Flora Malesiana Series 1: Volume 11 Part 3*.
- 3 Adinugraha & Susilawati. 2014. Variasi Kandungan Kimia Tanaman Sukun Dari Beberapa Populasi Di Indonesia Sebagai Sumber Pangan Dan Obat (Variation on Chemical Contents of Breadfruit (*Artocarpus altilis* [Parkinson] Fosberg) Taken from Several Populations in Indonesia as Source of Food and Medicine. *Jurnal Hutan Tropis* 2(3), 226 - 232.
- 4 Aji. 2000. Pengetahuan lokal Pembuatan Perahu Tradisional Oleh Suku Biak Di Kecamatan Warsa Kabupaten Biak Numfor. Jurusan Kehutanan, Fakultas Pertanian, Universitas Cenderwasih, Manokwari.
- 5 Alara et al. 2016. Review on *Phaleria macrocarpa* Pharmacological and Phtochemical Properties. *Drug Designing* 5 (3).
- 6 Ambarwati et al. 2017. Pharmacognostic and Antimicrobial Studies of *Garcinia latissima* Miq. Leaves (Clusiaceae). *Pharmacognosy Journal* 9 (4), 493 - 498.
- 7 Anastasia. 2007. Efektivitas zodia (*Evodia suaveolens*) sebagai penghalau nyamuk culex. Universitas Kristen Maranatha .
- 8 Andersen. 2006. Babrongko: Material culture of a Lake Sentani Village, New Guinea. Cenderawasih University, Jayapura, Papua, Indonesia.
- 9 Andersen. 2006. The Ketengban people of the greater Nongme area and their environment. Cenderawasih University, Jayapura, Papua, Indonesia.
- 10 Andersen. 2007. The Lepki people of Sogber River, New Guinea. Cenderawasih University, Jayapura, Papua, Indonesia.
- 11 Anon. 2009. Tahukah Kita: Kayu Marero (*Lumnitzera littoralis*) adalah lambang kasih sayang bagi masyarakat etnik Tamakuri, Papua. *Warta Konservasi Lahan Basah (Wetlands International)*, 17 (3), 24.
- 12 Anstice. 2004. *First Contact: A 21st century discovery of cannibals*. Book.
- 13 Argent, G. 2001. Contributions to the Flora of Mt Jaya VI. A New Banana, *Musa johnsii* (Musaceae) from New Guinea. *Gardens' Bulletin Singapore*, 53, 1 - 7.
- 14 Arobaya & Pattiselanno. 2007. Ethnobotany of Dasigo Tribe of Mamberamo in Papua. *Beccariana* 9(1), 1-4.
- 15 Arobaya & Pattiselanno. 2010. Hutan mangrove dan kelompok etnis di Papua: Bentuk pemanfaatannya oleh masyarakat lokal. *Biota* 15(3). <https://fpattiselanno.wordpress.com/2010/10/25/hutan-mangrove-dan-kelompok-etnis-di-papua-bentuk-pemanfaatannya-oleh-masyarakat-lokal/>
- 16 Arobaya & Pattiselanno. 2011. Human-Plants Interaction: A Case Study on Useful Plants of Dasigo Tribe from Mamberamo, Papua Indonesia. In: *Perspectives in Animal Ecology and Reproduction*.
- 17 Arobaya and Pattiselanno. 2007. The Useful Plants of Dani Ethnic Groups at The Baliem Valley of Papua. *Biota* 12 (3): 192-195.
- 18 Arobaya et al. 2010. Forage food of Timor Deer (*Cervus timorensis*) in Manokwari, West Papua. *Animal Production*, 12 (2): 91-95.
- 19 Arobaya. 2014. Fuel Wood Utilization as alternative energy resource in Mamberamo Hulu of Papua. *Jurnal Hutan Tropis* 2(2): 88-93.
- 20 Arung et al. 2012. Antioxidant compounds from leaves of Tahongai (*Klienhowia hospita*). *Journal of Wood Science*, 58, 77 - 80.
- 21 Asa. 2013. Tanaman pokem dalam tradisi lokal etnis Biak di Pulau Numfor, Kabupaten Biak Numfor. Kementerian Pendidikan dan Kebudayaan, Direktorat Jenderal Kebudayaan, Balai Pelestarian Nilai Budaya Papua, 2013. Report.
- 22 Assa et al. 2015. Tanaman Pokem Dalam Tradisi Lokal Etnis Biak di Pulau Numfor Kabupaten Biak Numfor.

- 23 Astirin et al. 2009. The effect of Crude Extract of *Pandanus conoideus* Lamb. Var. Yellow Fruit on Apoptotic Expression of the Breast Cancer Cell Line (T47D). *Biodiversitas* 10(1): 44-48.
- 24 Attamimi. 1997. Pengetahuan masyarakat suku mooii tentang pemanfaatan sumber daya nabati di dusun maibo desa aimas kabupaten sorong. Jurusan Kehutanan, Fakultas Pertanian, Universitas Cenderwasih, Manokwari.
- 25 Ave. 1998. Preliminary List of The Use Of The Plants Of Ayawasi. Book.
- 26 Baharuddin & Taskirawati. 2009. Buka Ajar: Hasil Hutan Bukan Kayu. Fakultas Kehutanan Universitas Hasanuddin.
- 27 Baker & Dransfield. 2017. More new rattans from New Guinea and the Solomon Islands (Calamus, Areaceae). *Phytotaxa* 305 (2): 061–086.
- 28 Baker et al. 2006. *Dransfieldia* (Areaceae) A New Palm Genus from Western New Guinea. *Syst. Bot.* 31(1): 61-69.
- 29 Baker. 2005. Rattans and rheophytes of Mubi River. *Principes* 41(3): 148-157.
- 30 Baker, W. J., & Dransfield, J. 2014. New rattans from New Guinea (Calamus, Areaceae). *Phytotaxa*, 163(4), 181-215.
- 31 Baker, W. J., & Dransfield, J. 2002. *Calamus longipinna* (Areaceae: Calamoideae) and its relatives in New Guinea. *Kew Bulletin* 853-866.
- 32 Baker, W. J., & Heatubun, C. D. 2012. New palms from Biak and Supiori, Western New Guinea. *Palms* 56(3): 131.
- 33 Baker, W. J., Bayton, R. P., Dransfield, J., & Maturbongs, R. A. 2003. A revision of the *Calamus aruensis* (Areaceae) complex in New Guinea and the Pacific. *Kew Bulletin* 351-370.
- 34 Balun & Holdsworth. 1988. Ethnomedicine of the Gulf Province of Papua New Guinea PART I: The Mountains Around Kanabea and Kaintiba. *International Journal of Crude Drug Research*, 26(1): 51 - 55.
- 35 Banka, R., & Baker, W. J. 2004. A monograph of the genus *Rhopaloblaste* (Areaceae). *Kew Bulletin*, 47-60.
- 36 Barden et al. 2000. Heart of the Matter: Agarwood Use and Trade and CITES Implementation for *Aquilaria malaccensis*.
- 37 Barfod et al. 2001. Field Guide to Palms in Papua New Guinea with a multi-access key and notes on the genera. AAU Reports, 40.
- 38 Barfod, A. S. 2000. A new species of *Licuala* from New Guinea. *Palms*, 44(4): 198-201.
- 39 Barfod, A. S., & Heatubun, C. D. 2009. Two new species of *Licuala* Thunb. (Areaceae: Coryphoideae) from North Moluccas and Western New Guinea. *Kew Bulletin*, 64(3): 553-557.
- 40 Barker. 1985. A survey of the utilization of bush resources in Kamus: November 1984 - February 1985. Book.
- 41 Barrau. 1956. Les ignames alimentaires des Iles du Pacifique Sud. *Journal d'agriculture tropicale et de botanique appliquée* 3(7-8), 385-401.
- 42 Barrau. 1958. Nouvelles observations au sujet des plantes hallucinogènes d'usage autochtone en Nouvelle-Guinée. *Journal d'agriculture tropicale et de botanique appliquée* 5 (4-5): 377-378.
- 43 Barrau. 1959. The Sago Palms and Other Food Plants of Marsh Dwellers in the South Pacific Islands. *Economic Botany* 13(2): 151-162.
- 44 Barrau. 1965. Witnesses of the past: notes on some food plants of Oceania. *Ethnology* 4(3): 282-294.
- 45 Barrows et al. 2007. Anti-TB activity of *Evodia elleryana* bark extract. *Fitoterapia*, 78 (3), 250 - 252.
- 46 Bau & Poulsen. 2007. Ethnobotanical Notes on Gingers of the Huon Peninsula in Papua New Guinea. *Gardens' Bulletin Singapore*, 59 (1&2), 23-34.
- 47 Berg & Corner. 2005. *Flora Malesiana*. Series 1: Volume 17 (2).
- 48 Berg, Corner & Jarrett. 2006. *Flora Malesiana*. Series 1: Volume 17.

- 49 Blackwood. 1940. Uses of plants among the Kukukuku of southeast-central New Guinea. Proceedings of the Sixth Pacific Science Congress of the Pacific Science Association, vol. 4, pp. 111-126. Berkeley & Los Angeles: University of California Press.
- 50 Blench. 2008. A history of fruits on the Southeast Asian mainland. Occasional Paper 4: 115-137.
- 51 Boer & Ella (Eds.). 2000. Plant Resources of South-East Asia No. 18 Plants producing exudates. Book.
- 52 Bohs. 1989. Ethnobotany of the Genus *Cyphomandra* (Solanaceae). Economic Botany, 43(2), 143 - 163.
- 53 Boissière et al. 2007. People priorities and perceptions: Towards conservation partnership in Mamberamo. Center for International Forestry Research: Jakarta, Indonesia.
- 54 Boissiere. 1999. Etnobiologi dan hubungan masyarakat suku Yali dengan alam lingkungan di Irian Jaya (Indonesia). PhD Thesis.
- 55 Boissière. 1999. La Patate Douce Et L'arachide. Transformations D'une Agriculture Yali (Irian Java, Indonésie). Journal d'agriculture traditionnelle et de botanique appliquée 41(1): 131-156.
- 56 Boland et al. 1977. *Eucalyptus deglupta* Blume And *Araucaria cunninghamii* Lambert Provenance Seed Collections in Irian Jaya, Indonesia, 3-17 June 1975. Forest Genetic Resources Information, 6, 3 - 15.
- 57 Bolza. 1975. Properties and Uses of 175 Timber Species from Papua New Guinea and West Irian. Division of Building Research, Melbourne.
- 58 Bonnemère. 1993. *Pangium edule*: A food for the social body among the Ankave-anga of Papua New Guinea. Man and the Biosphere Series, 13: 661-672. Chapter 36
- 59 Bourke. 1982. Root crops in Papua New Guinea. In: Proceedings of the 5th International Symposium on Tropical Root and Tuber Crops.
- 60 Bourke. 1992. Fifty years of Agricultural Change in A New Guinea Highland Village. in: Proceedings of the First Papua New Guinea Food and Nutrition Conference: Changes in Food and Nutrition in the Last Three Decades, 26 - 53.
- 61 Bourke. 1996. Edible Indigenous Nuts in Papua New Guinea. In: Stevens, M. L., Bourke, R. M. and Evans, B. R., ed. 1996. South Pacific Indigenous Nuts. Proceedings of a workshop held from 31 October to 4 November 1994 at Le Lagon Resort, Port Vila, Vanuatu. ACIAR Proceedings No. 69, 176 pp. pg. 45 - 55
- 62 Bourke. 1997. Management of fallow species composition with tree planting in Papua New Guinea. Paper presented for the Resource Management in Asia-Pacific Seminar Series 5 June 1997.
- 63 Bourke. 2001. Intensification of agricultural systems in Papua New Guinea. Asia Pacific Viewpoint, 42 (2/3), 219 - 235.
- 64 Bourke. 2010. Altitudinal limits of 230 economic crop species in Papua New Guinea. In: Altered Ecologies: Fire, Climate and Human Influence on Terrestrial Landscapes. Terra Australis, 32.
- 65 Bourke. 2010. Indigenous Edible Nuts in Papua New Guinea. In: Quartermain, A.R. and Tomi, B. (eds). 2010. Fruits and Nuts: Research and Development Issues in Papua New Guinea. Workshop Proceedings No. 9. National Agricultural Research Institute, Lae, Papua New Guinea. Chapter 12
- 66 Bourke. 2010. Indigenous Fruit in Papua New Guinea. In: Quartermain, A.R. and Tomi, B. (eds) 2010. Fruits and Nuts: Research and Development Issues in Papua New Guinea. Workshop Proceedings No. 9. National Agricultural Research Institute, Lae, Papua New Guinea. Chapter 6
- 67 Bowers. 1964. A further note on a recently reported root crop from the New Guinea Highlands. The Journal of the Polynesian Society 73 (3): 333-335.
- 68 Brawijasari et al. 2013. Antibacterial Activity and Bioautography Of Ethanol Extract Of Akway (*Drimys piperita* Hook. f.) Bark Against *Bacillus subtilis* and *Pseudomonas aeruginosa*.

- 69 Brink & Escobin (Eds.). 2003. Plant Resources of South-East Asia No. 17 Fibre Plants. Book.
- 70 Bromley & Barrau. 1965. Présence d'un Coix cultivé dans les montagnes de la Nouvelle-Guinée. *Journal d'agriculture tropicale et de botanique appliquée*, 12(12): 781 - 782.
- 71 Brown. 1978. *Timbers of the World 8: Australasia*. Book.
- 72 Brownson et al. 2002. The cycad neurotoxic amino acid,  $\beta$ -N-methylamino-L-alanine (BMAA), elevates intracellular calcium levels in dissociated rat brain cells. *Journal of Ethnopharmacology*, 82, 159 - 167.
- 73 Bulmer. 1964. Edible seeds and prehistoric stone mortars in the Highlands of East New Guinea. *Man* 64: 147-150.
- 74 Buntu. 2002. Tingkat kesukaan burung cenderawasih (*Paradisaea* sp) Terhadap beberapa jenis pakan di taman burung dan taman anggrek biak. Fakultas Pertanian Universitas Negeri Papua Manokwari.
- 75 Burnett et al. 2003. Flora and Fauna Survey of the Tangguh LNG Site Papua Province, Indonesia.
- 76 Cabuy et al. 2012. Non-woody plant species of Papuan island forests, a sustainable source of food for the local communities. *Indian Journal of Traditional Knowledge* 11(4).
- 77 Cameron et al. 2016. Uji Bioaktivitas Ekstrak Daun Zodea (*Evodia suaveolens* Scheff) terhadap Hama Gudang *Tribolium castaneum* (Coleoptera: Tenebrionidae) Herbst. *E-Jurnal Agroteknologi Tropikam*, 5(3), 222 - 231.
- 78 Case et al. 2005. Factors in Maintaining Indigenous Knowledge among the Ethnic Communities of Manus Island. *Economic Botany*, 59(4): 356 - 365.
- 79 Case et al. 2006. Ethnopharmacological evaluation of the informant consensus model on anti-tuberculosis claims among the Manus. *Journal of Ethnopharmacology*, 106, 82 - 89.
- 80 Cepeda et al. 2011. Komposisi Kimia Minyak Atsiri Kulit Kayu Akway (*Drimys piperita* hook F.). *Bionatura - Jurnal Ilmu-ilmu Hayati dan Fisik*, 13 (2): 118-124.
- 81 Chaplin. 1993. *Silvicultural Manual for the Solomon Islands*. Book.
- 82 Choudhary et al. 2017. Anti-fertility and abortifacient potential of hydroalcoholic leaves extract of *Alstonia scholaris* in female rats: An ethnomedicine used by Papua women in New Guinea. *Bulletin of Faculty of Pharmacy, Cairo University*, 55, 123 - 127.
- 83 Coiffier. 2002. Une « huile » végétale aux multiples usages dans la région du fleuve Sépik (Papouasie Nouvelle-Guinée). *Journal de la Société des Océanistes* 114-115.
- 84 Collier. 1987. Illness and Traditional Medicines of the Tepera. *Irian*, 15, 62 - 103.
- 85 Compton & Zich. 2002. *Gyrinops ledermannii* (Thymelaeaceae), being an agarwood-producing species prompts call for further examination of taxonomic implications in the generic delimitation between *Aquilaria* and *Gyrinops*. *Flora Malesian Bulletin* 13(1): 61-65.
- 86 Conn. 1995. *Handbooks of the Flora of Papua New Guinea Volume 3*. Melbourne University Press, Carlton South, Victoria.
- 87 Conservation International. 2006. *Atlas Sumberdaya Pesisir Kabupaten Raja Ampat Provinsi Irian Jaya Barat*.
- 88 Cook. 2016. *Amungme ethnobotany*.
- 89 Cooper. 1971. Some Botanical and Phytochemical Observations in Netherlands New Guinea "New Zealand New Guinea Expedition 1961. *Economic Botany* 25(4): 345-356.
- 90 Crittenden. 1982. *Sustenance, seasonality and social cycles on the Nembi plateau, Papua New Guinea*. PhD Thesis.
- 91 Croft & Leach. 1985. New Guinea Salt Fern (*Asplenium acrobryum* complex): Identity, Distribution and Chemical Composition of Its Salt. *Economic Botany*, 39(2), 139 - 149.

- 92 Croft. 1982. Ferns and Man in New Guinea based on a paper presented to Papua New Guinea Botany Society 1982. <http://155.187.2.24/fern/ferns-man-ng.html>
- 93 Dahrudin et al. 2005. Jenis-Jenis Tumbuhan Sumber Pakan dan Tempat Bersarang Kuskus (Famili Phalangeridae) di Cagar Alam Biak Utara, Papua. *Biodiversitas*, 6(4), 253 - 258.
- 94 de Guzman & Siemonsma (Eds). 1999. Plant Resources of South-East Asia No. 13 Spices. Book.
- 95 De Kok & Mabblerley. 1999. The Genus *Faradaya* (Labiatae). *Blumea*, 44: 321-342.
- 96 de Kok et al. 2009. The genus *Teijsmanniodendron* Koord. (Lamiaceae). *Kew Bulletin*, 64, 587 - 625.
- 97 de Kok. 2012. A revision of the genus *Gmelina* (Lamiaceae). *Kew Bulletin*, 67, 293 - 329.
- 98 de Kok. 2013. The genus *Premna* L., (Lamiaceae) in the Flora Malesiana area. *Kew Bulletin*, 68 (1), 55 - 84.
- 99 de Padua et al. (Eds.). 1999. Plant Resources of South-East Asia No. 12 (1) Medicinal and poisonous plants 1. Book.
- 100 de Wilde & Duyfjes. 2010. Flora Malesiana. Series 1: Volume 19.
- 101 de Wilde & Duyfjes. 2016. Flora Malesiana. Series 1: Volume 22.
- 102 de Wilde. 2000. Flora Malesiana. Series 1: Volume 14.
- 103 Desianto. 2002. Diversitas palem pada bagian utara kawasan cagar alam pegunungan Cyclops. *Beccariana* 4(1): 1-14.
- 104 Dirgantara et al. 2013. Uji Aktivitas Antioksidan Tiga Spesies Tanaman Sarang Semut (Famili: Rubiaceae) Asal Kabupaten Merauke, Papua. *Jurnal Biologi Papua*, 5 (1), 10 - 16.
- 105 Djamalui. 1998. Jenis-jenis tumbuhan berkayu dan pemanfaatannya dalam kehidupan suku Sougb di desa surey kecamatan Surey kabupaten Dati ii Manokwari. Fakultas Pertanian Universitas Cenderawasi Manokwari.
- 106 Djoht. 2002. Etnobotani Pisang Suku Karon: Studi tentang Ekologi Pangan Pokok. *Antropologi Papua* 1(2).
- 107 Dowe, J. L., & Barfod, A. S. 2001. New species of *Livistona* R. Br. (Arecaceae) from north Queensland and Papua New Guinea. *Austrobaileya*, 6(1), 165-174.
- 108 Dowe, J. L., & Ferrero, M. D. 2001. Revision of *Calyptrcalyx* and the New Guinea species of *Linospadix* (Linospadicinae: Arecaceae). *Blumea* 46(2): 207-251.
- 109 Dransfield & Manokaran (Eds.). 1993. Plant Resources of South-East Asia No. 6 Rattans. Book.
- 110 Dransfield & Widjaja. 1995. Plant Resources of South-East Asia No. 7 Bamboos. Book.
- 111 Dransfield, J., & Baker, W. J. 2003. An account of the Papuasian species of *Calamus* (Arecaceae) with paired fruit. *Kew bulletin*, 371-387.
- 112 Duwila et al. 2003. Pemanfaatan jenis-jenis Kayu Sebagai Bahan Baku Pembuatan Perahu Tradisional oleh Masyarakat Kampung Wariap Distrik Ransiki Kabupaten Manokwari. *Beccariana*, 5 (2), 109 - 116.
- 113 Dwyer & Minnegal. 1990. Yams and Megapode Mounds in the Lowland Rain Forest of Papua New Guinea. *Human Ecology* 18(2): 177-185.
- 114 Dwyer & Minnegal. 1992. Ecology and Community Dynamics of Kubo People in the Tropical Lowlands of Papua New Guinea. *Human Ecology*, 20(1): 21-55.
- 115 Dwyer & Minnegal. 1994. Sago Palms and Variable Garden Yields: A Case Study from Papua New Guinea. *Man and Culture in Oceania*, 10, 81-102.
- 116 Eddowes. 1977. Commercial Timbers of Papua New Guinea: Their Properties and Uses. Book.
- 117 Edison et al. 2002. The exploration of Musaceae in Irian Jaya (Papua). Research Institute for Fruits Central Research Institute for Horticulture.

- 118 Ehrlich. 2000. "Inedible" to "Edible": Firewalking and the Ti Plant [*Cordyline fruticosa* (L.) A. Chev]. *The Journal of the Polynesian Society*, 109 (4), 371 - 400.
- 119 Ekowati. 2013. *Karakteristik Ekologi, Potensi Dan Upaya Konservasi Tumbuhan Tebu Rawa (Hanguana malayana) Di Kabupaten Mappi, Papua*. Sekolah Pasca Sarjana Institut Pertanian Bogor Bogor.
- 120 Emsley. 1989. False Sago Palm Harbours deadly amnio acid. *New Scientist*, 124, 1685. <https://www.newscientist.com/article/mg12416852-400-science-false-sago-palm-harbours-deadly-amino-acid/>
- 121 Essig & Young. 1980. Palm collecting in Papua New Guinea. I. The Northeast. *Principes* 24(1): 14-28.
- 122 Essig. 1995. A checklist and analysis of the palms of the Bismarck archipelago. *Principes* 39(3): 123-129.
- 123 Farjon. 2017. *A handbook of the World's conifers*. Brill, Leiden.
- 124 Fatem et al. 2014. Ethno-Biological Notes on the Meyah Tribe From the Northern Part of Manokwari, West Papua (Catatan Etnobiologi Pada Suku Meyah di Pantai Utara Manokwari, Papua Barat). *Jurnal Manusia dan Lingkungan*, 21 (1), 121 - 127.
- 125 Fernandez et al. 2010. Antiparasitic activity of alkaloids from plant species of Papua New Guinea and Australia. *International Journal of Antimicrobial Agents*, 36, 275 - 279.
- 126 Flach & Rumawas (Eds.). 1996. *Plant Resources of South-East Asia No. 9 Plant yielding non-seed carbohydrates*. Book.
- 127 Flavelle. 1991. *A Traditional Agroforestry Landscape on Fergusson Island, Papua New Guinea*. Doctoral dissertation, University of British Columbia.
- 128 Forster. 1990. Notes on *Aclepiadaceae* 2. *Austrobaileya*, 3(2), 273 - 289.
- 129 Forster. 1993. The Synonymy of *Anodendron paniculatum* (*Apocynaceae*) with Notes on Distribution and Ethnobotany in Papuasia. *Kew Bulletin*, 48 (1), 139 - 142.
- 130 French. 1986. *Food plants of Papua New Guinea*. 2nd edition.
- 131 French. 2006. *Sago and Gardening Foi Kutubu; A subsistence food production system based on sago production*. *Food Plants International*, Tasmania.
- 132 Fundter & Wisse. 1977. 40 Belangrijke Houtsoorten Uit Indonesisch Nieuw Guinea (Irian Jaya) Met De Anatomische En Technische Kenmerken 40 Important timber species from Indonesian New Guinea (Irian Jaya) with their anatomical and technical characteristics. Book.
- 133 Gagne. 1982. Staple crops in subsistence agriculture.in: *Biogeography and Ecology of New Guinea - Part 2*.
- 134 Gardner. 2003. Piper (*Piperaceae*) In *New Guinea: The Non-Climbing Species*. *Blumea*, 48 47 - 68.
- 135 Gardner. 2010. Plant names of the Kalam (Upper Kaironk Valley, Schrader Range, Papua New Guinea). *Records of the Auckland Museum*, 47: 5-50.
- 136 Girard & Barrau. 1957. Quelques plantes alimentaires en usage chez les Buang. *Journal d'agriculture tropicale et de botanique appliquée*, 4(5-6), 212 - 227.
- 137 Glick. 1967. Medicine as an Ethnographic Category: The Gimi of the New Guinea Highlands. *Ethnology*, 6(1): 31-56.
- 138 Godschalk. 1993. *Sela Valley: An Ethnography of a Mek Society in the Eastern Highlands, Irian Kaya, Indonesia*. Thesis.
- 139 Grossman. 1991. Diet, income, and subsistence in an eastern highland village, Papua New Guinea. *Ecology of Food and Nutrition* 26(3): 235-253.
- 140 Grubben & Soetjipto Partohardjono (Eds.). 1996. *Plant Resources of South-East Asia No. 10 Cereals*. Book.
- 141 Gusbager et al. 2003. Jenis Palem Di Daerah Aliran Sungai Tami Arso-Jayapura (Palem Species in the River Basin od Tami, Arso Jayapura). *Beccariana* 5 (2), 82 - 96.

- 142 Haberle. 2005. Ethnobotany of the Tari Basin, Southern Highlands Province, Papua New Guinea. Palaeoworks Technical Paper 6.
- 143 Hamsar & Mizaton. 2012. Potential of Ant-Nest Plants As An Alternative Cancer Treatment. *Journal of Pharmacy Research*, 5 (6), 3063 - 3066.
- 144 Hamzah et al. 2003. Pemanfaatan Tumbuhan Obat Tradisional Oleh Masyarakat Pulau Mansinam Kabupaten Manokwari (The Use of Plants for Traditional Medicine by People Living in Mansinam Island of Manokwari). *Beccariana*, 5 (2), 52 - 60.
- 145 Handayani. 2014. Etnofarmakologi Papua.
- 146 Hanum & van der Maesen (Eds.). 1997. Plant Resources of South-East Asia No. 11 Auxiliary Plants. Book.
- 147 Hanum & Warseno. 2015. *Dimorphanthera kempteriana* Schltr. LIANA BERPOTENSI HIAS. *Warta Kebun Raya*, 13(1), 40 - 43.
- 148 Hapsari. 2010. Studi Kimia Dan Farmakologi: Tumbuhan Obat Indonesia, Kayu Lawang, (*Cinnamomum culilaban* (L.) Presl.). Fakultas Matematika Dan Ilmu Pengetahuan Alam Program Studi Magister Ilmu Kimia Depok.
- 149 Harbelubun. 2005. Natural colourant plant and the use of traditionally by tribe of Marori Men-Gey in Wasur National Park, Merauke Regency. *Biodiversitas* 6 (4): 281-284.
- 150 Hariadi. 2008. Pendugaan Daya Tampung Walabi Lincah (*Macropus agilis*) di Padang Rumput Mar Taman Nasional Wasur Merauke. *Jurnal Ilmu Peternakan Dan Veteriner* 3(2), 58 - 63.
- 151 Hart. 1973. *Timbers of South East Asia*. Book.
- 152 Hartemink. 2010. The invasive shrub *Piper aduncum* in Papua New Guinea: a review. *Journal of Tropical Forest Science* 22(2): 202-213.
- 153 Hartzlet. 1987. Health Care Options and Attitudes Among The Sentani. *Irian*, 15: 49-60.
- 154 Haryanto et al. 2009. Pemanfaatan Tumbuhan Obat Masyarakat Marind yang Bermukim di Taman Nasional Wasur, Merauke. *Jurnal Biologi Papua* 1(2): 58-64.
- 155 Hastuti. 2002. Tumbuhan Obat Menurut Etnobotani suku Biak. *Beccariana* 4(1): 20-40.
- 156 Hays. 1979. Plant Classification and Nomenclature in Ndumba, Papua New Guinea Highlands. *Faculty Publications Paper* 286.
- 157 Hays. 1980. Uses of Wild Plants in Ndumba, Eastern Highlands Province. *Science in New Guinea*, 7(3), 118 - 131.
- 158 Hays. 1981. Some Cultivated Plants in Ndumba, Eastern Highlands Province. *Science in New Guinea*, 8(2), 122 - 131.
- 159 Hays. 1999. Revision of Homalomena (Araceae-Homalomeneae) in New Guinea, The Bismarck Archipelago and Solomon Islands. *Blumea* 44, 41 - 71.
- 160 Hays. 2003. They are Beginning to Learn the Use of Tobacco: Cultural Context and the Creation of a Passion in Colonial Papua New Guinea. In: *Drugs, labor and colonial expansion*.
- 161 Heatubun & Wally. 2000. Jenis Bambu Di Pulau Mansinam, Manokwari, Irian Jaya (The Bamboo Species in Mansinam Island, Manokwari, Irian Jaya). *Beccariana*, 2(2), 65 - 69.
- 162 Heatubun et al. 2012. A monograph of the betel nut palms of East Malesia. *Bot J Linn Soc* 168: 147-173.
- 163 Heatubun et al. 2013. A new species of betel nut palm (*Areca*: *Arecaceae*) from western New Guinea. *Phytotaxa* 154(1).
- 164 Heatubun et al. 2014. Three new genera of Arecoid palm from eastern Malesia. *Kew Bulletin* 69.
- 165 Heatubun et al. 2009. A monograph of *Cyrtostachys*. *Kew Bulletin* 64(1).
- 166 Heatubun et al. 2014. Palms on the Nickel Island: An Expedition to Gag Island, Western New Guinea. *Palms*, 58(3), 115 - 134.
- 167 Heatubun et al. 2018. A monograph of the Nengella group of *Hydriatele* (*Arecaceae*). *Kew Bulletin*, 73 (1), 18.
- 168 Heatubun. 2000. Beberapa Jenis Palem Hias Di Kawasan Hutan Teminabuan Sorong, Irian Jaya (Some Species of Ornamental Palm in Teminabuan Forest Area, Sorong, Irian Jaya). *Beccariana*, 2(2), 70 - 74.

- 169 Heatubun. 2016. *Areca jokowi*: a New Species of Betel Nut Palm (Arecaceae) from Western New Guinea. *Phytotaxa* 288(2): 175-180.
- 170 Heatubun, Gardiner & Baker. 2012. *Heterospatha elata*, a new record for the New Guinea islands. *Palms* 56(2): 61-64.
- 171 Hendra et al. 2011. Flavonoid Analyses and Antimicrobial Activity of Various Parts of *Phaleria macrocarpa* (Scheff.) Boerl Fruit. *International Journal of Molecular Sciences*, 12, 3422 - 3431.
- 172 Henty. 1960. Two drug plants in Native Culture. *Transactions of the Papua and New Guinea Scientific Society*: 19-20.
- 173 Henty. 1969. *A Manual of the Grasses of New Guinea*. Book.
- 174 Henty. 1980. *Harmful Plants in Papua New Guinea*. Book.
- 175 Henty. 1981. *Handbooks of the Flora of Papua New Guinea Volume 2*. Melbourne University Press, Carlton South, Victoria.
- 176 Hermanto & Faramayuda. 2017. Pengaruh Pemberian Ekstrak Air Kayu Akway (*Drymis piperita* Hook. f.) Pada Pertumbuhan *Plasmodium falciparum* Penyebab Malaria. *Kartika-Jurnal Ilmiah Farmasi* 5(1): 24 - 25.
- 177 Hertel. 1998. *Traditional Plant Use by the Didipa Clan, Baitabang, Papua New Guinea*. Book.
- 178 Hertiani et al. 2010. Preliminary Study on Immunomodulatory Effect of Sarang-Semut Tubers *Myrmecodia tuberosa* and *Myrmecodia pendens*. *OnLine Journal of Biological Sciences* 10(3), 136 - 141.
- 179 Hide et al. 1979. A Checklist of Some Plants in the Territory of the Sinasina Nimai (Simbu Province, Papua New Guinea), with Notes on Their Uses. Department of Anthropology, University of Auckland.
- 180 Hide. 1984. *The Research Report of the Simbu Land Use Project Volume VI: South Simbu: Studies in Demography, Nutrition and Subsistence*. The Institute of Applied Social and Economic Research, Boroko, Papua New Guinea.
- 181 Hiepko & Schultze-Motel. 1981. Floristische und ethnobotanische Untersuchungen im Eipomek-Tal, Irian Jaya (West-Neuguinea), Indonesia. *Mensch, Kultur und Umwelt im zentralen Bergland von West-Neuguinea*, 7.
- 182 Hill. 2001. Traditional paint from Papua New Guinea: Context, materials and techniques, and their implications for conservation. *The Conservator* 25(1): 49 - 61.
- 183 Hoffmann. 2006. *Malesian Euphorbiaceae Descriptions 8. Antidesma in Malesia and Thailand*, 1 - 292. Royal Botanic Gardens, Kew. <http://www.nationaalherbarium.nl/Euphorbs/specA/Antidesma.htm>. Accessed on: 28/02/2018
- 184 Höft. 1992. *Plants of New Guinea and the Solomon Islands: Dictionary of the Genera and Families of Flowering Plants and Ferns*. Wau Ecology Institute, Handbook No. 13.
- 185 Holdsworth & Balun. 1992. Medicinal Plants of the East and West Sepik Provinces, Papua New Guinea. *International Journal of Crude Drug Research* 30(3): 218-222.
- 186 Holdsworth & Damas. 1986. Medicinal Plants of Morobe Province, Papua New Guinea Part III: The Finschhafen Coast. *International Journal of Crude Drug Research*, 24 (4): 217-225.
- 187 Holdsworth & Kerenga. 1987. A Survey of Medicinal Plants in the Simbu Province, Papua New Guinea. *International Journal of Crude Drug Research*, 25(3): 183-187.
- 188 Holdsworth & Kerenga. 1987. Medicinal Plants of the Western Highlands, Papua New Guinea. *International Journal of Crude Drug Research*, 25(3): 171-176.
- 189 Holdsworth & Lacanienta. 1981. Traditional Medicinal Plants of the Central Province of Papua New Guinea Part II. *Quarterly Journal of Crude Drug Research*, 19(4): 155-167.
- 190 Holdsworth & Lacanienta. 1981. Traditional Medicinal Plants of the Central Province of Papua New Guinea. *Quarterly Journal of Crude Drug Research*, 19 (4): 141-154.

- 191 Holdsworth & Mahana. 1983. Traditional Medicinal Plants of the Huon Peninsula Morobe Province, Papua New Guinea. *International Journal of Crude Drug Research* 21 (3): 121-133.
- 192 Holdsworth & Rali. 1989. A Survey of Medicinal Plants of the Southern Highlands, Papua New Guinea. *International Journal of Crude Drug Research*, 27(1): 1-8.
- 193 Holdsworth & Sakulas. 1992. High Altitude Medicinal Plants of Papua New Guinea Part II\*. Mount Wilhelm, Simbu Province. *International Journal of Pharmacognosy* 30(1): 1-4.
- 194 Holdsworth & Wamoi. 1982. Medicinal Plants of the Admiralty Islands, Papua New Guinea Part I. *International Journal of Crude Drug Research*, 20(4): 169-181.
- 195 Holdsworth et al. 1983. Traditional Medicinal Plants of New Ireland, Papua New Guinea. Part II. New Hanover Island. *International Journal of Crude Drug Research*, 21(4): 161-168.
- 196 Holdsworth et al. 1989. Traditional Medicinal Plants of New Ireland, Papua New Guinea. Part III. Konos, Central New Ireland. *International Journal of Crude Drug Research*, 27(1): 55-61.
- 197 Holdsworth, D.K. 1977. Medicinal Plants of Papua New Guinea. South Pacific Commission.
- 198 Holdsworth, D.K. 1980. Traditional Medicinal Plants of New Ireland, Papua New Guinea. *Quarterly Journal of Crude Drug Research*, 18(3): 131-139.
- 199 Holdsworth. 1980. Traditional Medicinal Plants of the North Solomons Province Papua New Guinea. *International Journal of Crude Drug Research* 18(1): 33-44.
- 200 Holdsworth. 1984. Phytomedicine of the Madang Province, Papua New Guinea. Part I. Karkar Island. *International Journal of Crude Drug Research* 22(3): 111-119.
- 201 Holdsworth. 1987. Medicinal Plants of the Central Province of Papua New Guinea: Part IV. The Goilala Mountain People. *International Journal of Crude Drug Research* 25(4): 231-235.
- 202 Holdsworth. 1987. Medicinal Plants of the Morobe Province, Papua New Guinea: Part V. The Upper Watut. *International Journal of Crude Drug Research*, 25(4): 225-230.
- 203 Holdsworth. 1989. High Altitude Medicinal Plants of Papua New Guinea. *International Journal of Crude Drug Research* 27(2): 95-100.
- 204 Holdsworth. 1991. Medicinal Plants of the Central Province of Papua New Guinea: Part V. Coastal Villages to the West and East of Port Moresby. *International Journal of Pharmacognosy*, 29(3), 231 - 236.
- 205 Holdsworth. 1992. Medicinal Plants of the Gazelle Peninsula, New Britain Island, Papua New Guinea. Part I. *International Journal of Pharmacognosy*, 30(3), 185 - 190.
- 206 Holdsworth. 1993. Medicinal Plants of the Gazelle Peninsula, New Britain Island, Papua New Guinea. Part II. *International Journal of Pharmacognosy* 31(1): 19-22.
- 207 Holdsworth. 1993. Medicinal Plants of the Oro (Northern) Province of Papua New Guinea. *International Journal of Pharmacognosy* 31(1): 23-28.
- 208 Holttum. 1967. The Bamboos of New Guinea. *Kew Bulletin* 21(2): 263-292.
- 209 Holttum. 1981. *Flora Malesiana Series 2: Part 1-5*.
- 210 Hopkins. 2018. The taxonomy and morphology of *Schizomeria* (Cunoniaceae) in New Guinea, the Moluccas and the Solomon Islands, with notes on seed dispersal and uses throughout the genus. *Kew Bulletin* 73(1): 11.

- 211 Howay et al. 2003. Pemanfaatan tumbuhan Sebagai Obat Tradisional Oleh Masyarakat Suku Maibrat Di Kampung Sembaro Distrik Ayamaru Kabupaten Sorong (Utilisation of Plants as Traditional Medicines by Maibrat Tribe in Sorong). *Beccariana* 5(1): 24-34.
- 212 Hymowitz & Boyd. 1977. Origin, Ethnobotany and Agricultural Potential of the Winged Bean: *Psophocarpus tetragonolobus*. *Economic Botany* 31: 180-188.
- 213 Hyndman D. C. & Frodin D. G. 1980. Ethnobotany of *Schefflera* in the Ok Tedi Region, Papua New Guinea. Book.
- 214 Hyndman D. C. 1984. Ethnobotany of Wopkaimin *Pandanus*: Significant Papua New Guinea Plant Resource. *Economic Botany* 38(3): 287-303.
- 215 Imbiri et al. 2000. Ekologi Rumput Kebar *Biophytum petersianum* Klotzsch. Di Kecamatan Kebar, Manokwari, Irian Jaya (An Ecological Aspect of *Biophytum petersianum* Klotzsch. In Kebar Distric, Manokwari, Irian Jaya). *Beccariana*, 2(2): 44-47.
- 216 Inama. 2008. Kajian etnobotani masyarakat suku marind sendawi anim di kawasan taman nasional wasur, kabupaten merauke, propinsi papua. Departemen Konservasi Sumberdaya Hutan Dan Ekowisata Fakultas Kehutanan Institut Pertanian Bogor.
- 217 Indaryani. 2002. The utilization of traditional medicine plants by Wondama tribe in Manokwary regency. *Beccariana* 4(1): 56-67.
- 218 Jadhav et al. 2009. Traditional medicinal uses of *Hibiscus rosa-sinensis*. *Journal of Pharmacy Research* 2(8): 1220-1222.
- 219 Jeffries. 1979. Report No. 1 From Kaukau to Coke: A Study of Rural and Urban Food Habits in Papua New Guinea. Book.
- 220 Jensen. 2001. Trees and Fruits of Southeast Asia: An Illustrated Field Guide. Book.
- 221 Johannes. 1975. Medicinal Plants of the Nekatigi of the Eastern Highlands. *Economic Botany* 29(3), 268 - 277.
- 222 Johannes. 1986. Medicinal Plants of the New Guinea Highlands: an Ethnopharmacologic and Phytochemical Update. In: *Plants in Indigenous Medicine and Diet: Biobehavioural Approaches*.
- 223 Johns. 1989. The flowering plants of Papuaasia Dicotyledons: Part 3 Caryophyllidae. Book.
- 224 Jorim et al. 2012. An ethnobotanical survey of medicinal plants used in the eastern highlands of Papua New Guinea. *Journal of Ethnobiology and Ethnomedicine* 8: 47.
- 225 Juillerat. 1984. D'Acorus à Zingiber: taxinomie et usages des plantes cultivées chez les Yafar de Nouvelle-Guinée. *Journal d'agriculture traditionnelle et de botanique appliquée* no. 1-2: 3-31.
- 226 Junaidi & Sawen. 2010. Keragaman Botanis Dan Kapasitas Tampung Padang Penggembalaan Alami Di Kabupaten Yapen. *Jurnal Ilmu Peternakan Dan Veteriner* 5(2): 92-97.
- 227 Kalkman & Nooteboom. 1998. *Flora Malesiana Series 2: Volume 3*.
- 228 Kalkman et al. 1997. *Flora Malesiana Series 1: Volume 13*.
- 229 Kameubun et al. 2012. Hubungan Antara Budaya Suku Marind Dengan Konservasi Tanaman Wati (*Piper methysticum* Forst.) Di Merauke, Papua Selatan. In Dewan Redaksi (Reviewer) *Prosiding Seminar Ilmiah se-Eropa Bidang Ekologi, Konservasi Sumberdaya Alam, Lingkungan, Iklim, Ilmu-ilmu Keteknik dan Matematik*.
- 230 Kameubun. 2014. Indigenous knowledge, morphological variation and genetic diversity of Kava (*Piper methysticum* Forst.) in Merauke, Papua, Indonesia. PhD thesis, Göttingen, Georg-August-Universität.
- 231 Kanro et al. 2003. Tanaman sagu dan pemanfaatannya di propinsi papua. *Jurnal Penelitian dan Pengembangan Pertanian* 22 (3):116-124.
- 232 Karim & Sismindari. 2011. Antiproliferatif Ekstrak Metanol Daun *Dianella nemorosa* Lam. (Liliaceae) terhadap Sel Kanker MKN45 dengan Menggunakan Metode WST-1. *Jurnal Biologi Papua* 3 (2): 47-52.
- 233 Keim & Dransfield. 2012. A monograph of the genus *Orania* (Arecaceae- Oranieae). *Kew Bulletin* 67: 127-190.

- 234 Keim. 2009. Pandanaceae of the island of Yapen, Papua (West New Guinea), with their nomenclature and notes on the rediscovery of *Sararanga sinuosa*, and several new species and records. *Blumea*, 54, 255 - 266.
- 235 Keim. 2012. The Pandan Flora of Foja-Mamberamo Game Reserve and Baliem Valley, Papua-Indonesia. *Reinwardtia* 13 (3): 271-297.
- 236 Koch et al. 2015. An ethnobotanical survey of medicinal plants used in the East Sepik province of Papua New Guinea. *Journal of Ethnobiology and Ethnomedicine* 11: 79.
- 237 Kogoya et al. 2014. Bioactive Components of Pandan's Fruits from Jayawijaya Mountains, Papua, Indonesia. *Journal of Environmental Science, Toxicology and Food Technology*, 8(8), 1 - 8.
- 238 Kogoya et al. 2014. Pandans Diversity in Mts. Jayawijaya Papua Indonesia. *Journal of Natural Sciences Research*.
- 239 Kostermans. 1969. A New Guinea Cinnamon Used As A Contraceptive. *Reinwardtia*, 7(5), 539 - 541.
- 240 Kress. 1990. The Taxonomy of Old World Heliconia (Heliconiaceae). *Allertonia*, 6(1), 1 - 58.
- 241 Krey. 1998. Teknik Pembibitan Dan Penanaman Sagu (*Metroxylon* spp.) Secara Tradisional Oleh Penduduk Asli Sentani Di Kabupaten Dati Ii Jayapura. Fakultas Pertanian Universitas Cenderawasi Manokwari.
- 242 Kumar et al. 2012. Potential antifertility agents from plants: A Comprehensive review. *Journal of Ethnopharmacology*, 140, 1 - 32.
- 243 Kusmana et al. 2003. Jenis-jenis pohon mangrove di teluk bintuni, papua.fakultas kehutanan institut pertanian bogor dan pt bintuni utama murni wood industries.
- 244 Kuswantoro. 2015. Mengenal Jeringau (*Acorus calamus* L.) Tumbuhan Akuatik dengan Berbagai Manfaat Obat dan Budaya. *Warta Konservasi Lahan Basah (Wetlands International)*, 23 (2): 18-19.
- 245 La Hisa et al. 2016. Etnobotani Masyarakat Suku Marori di Kabupaten Merauke, Papua. Book.
- 246 Lane-Poole. 1925. Forest resources of Papua and New Guinea. Book.
- 247 Lanoeroe. 2005. The use of vascular plants as traditional boat raw material by Yachai tribe in Mappi Regency. *Biodiversitas* 6(3): 212-216.
- 248 Lansky et al. 2008. *Ficus* spp. (fig): Ethnobotany and potential as anticancer and anti-inflammatory agents. *Journal of Ethnopharmacology*, 119, 195-213.
- 249 Larson et al. 2014. Interactions of Papua New Guinea medicinal plant extracts with antiretroviral therapy. *Journal of Ethnopharmacology*, 155, 1433 - 1440.
- 250 Laufa. 2009. Sago research in Pacific Island Countries and Southeast Asia-A Review. *South Pacific Studies*, 29 (2), 29 - 47.
- 251 Lemmens & Bunyapraphatsara (Eds). 2003. Plant Resources of South-East Asia No. 12(3) Medicinal and poisonous plants 3. Book.
- 252 Lemmens et al., (Eds.). 1995. Plant Resources of South-East Asia No. 5 (2) Timber trees: Minor commercial timbers. Book.
- 253 Lense. 2011. Biological screening of selected traditional medicinal plant species utilized by local people of Manokwari, West Papua Province. *Nusantara Bioscience* 3 (3): 145-150.
- 254 Lense. 2012. The wild plants used as traditional medicines by indigenous people of Manokwari, West Papua. *Biodiversitas* 13 (2): 98-106.
- 255 Leonard et al. 2003. Pemanfaatan Tumbuhan Dalam Ekosistem Mangrove Oleh Masyarakat Di Kampung Senebuay Distrik Rumberpon Kabupaten Manokwari (The use of Plants from Mangrove Forest by Local People in Senebuay Village District of Rumberpon Manokwari). *Beccariana*, 5 (2), 97 - 108.
- 256 Lestari et al. 2015. Toxicity and phytochemistry test of methanol extract of several plants from papua using Brine Shrimp Lethality Test (BSLT). *Journal of Chemical and Pharmaceutical Research* 7 (4): 866 - 872.

- 257 Liem. 2013. Isolasi Senyawa Saponin dari Mangrove Tanjung (Bruguiera gymnorrhiza) dan Pemanfaatannya sebagai Pestisida Nabati pada Larva Nyamuk. *Jurnal Biologi Papua*, 5 (1), 29 - 36.
- 258 Limbongan & Malik. 2009. Peluang pengembangan buah merah (*Pandanus conoideus* Lamk.) di provinsi Papua. *Jurnal Litbang Pertanian* 28(4): 134-141.
- 259 Linthin. 2000. Identifikasi jenis-jenis vegetasi sebagai pakan kuskus di pulau moor kecamatan napan weinami kabupaten nabire. Fakultas Pertanian Universitas Cenderawasi Manokwari.
- 260 Liwang. 2010. Pemanfaatan jenis kayu sebagai bahan baku pembuatan perahu tradisional di pulau Ambai, Papua. *Jurnal Tropica*.
- 261 Mabblerley, Pannell & Sing. 1995. *Flora Malesiana Series 1: Volume 12* (1).
- 262 Mabel et al. 2016. Identifikasi Dan Pemanfaatan Tumbuhan Obat Suku Dani Di Kabupaten Jayawijaya Papua. *Jurnal Mipa Unsrat Online*, 5 (2), 103 - 107.
- 263 Macap. 2013. Etnobotani pangan suku Matbat di pulau Misool kabupaten Raja Ampat Papua Barat. Departemen konservasi sumberdaya hutan dan ekowisata fakultas kehutanan institut pertanian Bogor.
- 264 Macfarlane. 1963. The Pain-Producing Properties of the Stinging Tree, *Laportea*. in: *Venomous and Poisonous Animals and Noxious Plants of the Pacific Region*.
- 265 Macklin & Parnell. 2016. *Dendromyza hiepkooana* sp. nov. from Irian Jaya and *D. staufferi* sp. nov. from Papua New Guinea (Amphorogynaceae). *Nordic Journal of Botany*, 34, 169 - 173.
- 266 Mahmud et al. 2017. Scenarios of Land-Use Change in Protected Forest of Wosi Rendani Manokwari District, West Papua, Indonesia. *Jurnal Manajemen Hutan Tropika*, 23 (1), 8 - 15.
- 267 Mahmud. 2011. Vegetasi Mangrove sebagai Bahan Makanan pada Empat Suku di Papua (Mangrove Vegetation as Foods amongst Ethnic in Papua). *Biota* 16 (1): 88-94.
- 268 Maima. 1996. Processing of Galip (*Canarium indicum*) in Papua New Guinea. in: Stevens, M. L., Bourke, R. M. and Evans, B. R., ed. 1996. *South Pacific Indigenous Nuts. Proceedings of a workshop held from 31 October to 4 November 1994 at Le Lagon Resort, Port Vila, Vanuatu*. ACIAR Proceedings No. 69: 118 - 121
- 269 Mamoribo et al. 2003. Pemanfaatan Vegetasi Mangrove Oleh Masyarakat Kampung Rayori Di Distrik Supiori Selatan Kabupaten Biak Numfor (Utilisation of Mangrove by the Community in Kampong Rayori, South Supiori, Biak Numfor). *Beccariana* 5(1): 43-51.
- 270 Mangera. 2011. Analisis Vegetasi Jenis Pohon Di Kawasan Hutan Kampung Wasur Pada Taman Nasional Wasur Distrik Merauke Kabupaten Merauke. *Agricola*, 1 (1), 18 - 35.
- 271 Marasinghe. 2016. Ethnochemistry and Ethnomedicine of Ancient Papua New Guineans and Their Use in Motivating Students in Secondary Schools and Universities in PNH. *Universal Journal of Educational Research*, 4(7), 1724 - 1726.
- 272 Mardany et al. 2016. Skrining Fitokimia dan Uji Aktivitas Sitotoksik dari Tumbuhan Sarang Semut (*Myrmecodia beccarii* Hook.f.) Asal Kabupaten Merauke. *Jurnal Biologi Papua*, 8 (1), 13 - 22.
- 273 Marwa et al. 2013. Potential and pattern of utilization of Renewable Energy sources from vegetation based on local knowledge of Ileres tribe in Tambrauw, West Papua, Indonesia. *Indian Journal of Traditional Knowledge* 12 (2): 411-417.
- 274 Matthews & Gosden. 1997. Plant Remains from Waterlogged Sites in the Arawe Islands, West New Britain Province, Papua New Guinea: Implications for the History of Plant Use and Domestication. *Economic Botany* 51(2): 121 - 133.
- 275 Maturbongs. 2000. Etnobotani suku Tepin di pulau Salawati kabupaten dati Sorong, Irian Jaya. *Beccariana* 2(2): 38-43.
- 276 May. 1984. *Kaikai Aniani: A guide to bush foods markets and culinary arts of Papua New Guinea*. Book.

- 277 Mebs. 2000. Notes on the traditional use of plants to treat snake bite in northern Papua New Guinea. *Toxicon* 38: 299-302.
- 278 Middleton. 2007. Flora Malesiana: Apocynaceae. Series 1: Volume 18. <http://portal.cybertaxonomy.org/flora-malesiana/cdm.dataportal/taxon/68794e01-eb53-4cf4-8eb8-5d7ca06dfab8>
- 279 Miklouho-Maclay. 1886. List of plants in use by the natives of the Maclay-coast, New Guinea. *Proceedings of the Linnean Society of New South Wales* 10: 346-358.
- 280 Milliken. 1994. *Ethnobotany of the Yali of West Papua*. Edinburgh: Royal Botanic Garden.
- 281 Modouw. 2006. Struktur dan komposisi hutan pamah pegunungan Cyclops serta pemanfaatan kayu *Xanthostemon* spp., oleh masyarakat etnis Sentani Jayapura Papua (The structure and composition of the Cyclops Mountains pamah forest and the conservation and use of the wood of *Xanthostemon* spp., by the Sentani ethnic community at Jayapura in Papua). Universitas Indoneisa, Fakultas Matematika Dan Ilmu Pengetahuan Alam Program Pascasarjana Program Studi Biologi Depok.
- 282 Mom et al. 2015. Studi Ethnobotani Tumbuhan Daun Gatal Di Kecamatan Kwamkilama Kabupaten Mimika. *COCOS*, 6 (14).
- 283 Morren & Frodin. 1992. A preliminary vernacular guide to the vegetation of northern Telefomin district, Papua New Guinea. Department of Human Ecology Research Paper/New Jersey Agricultural Experiment Station Publication P-26501-1-92. New Brunswick, N.J., Rutgers, The State University of New Jersey.
- 284 Motley, T. J. 2004. The ethnobotany of *Fagraea* Thunb. (Gentianaceae): The timber of Malesia and the scent of Polynesia. *Economic Botany* 58(3): 396-409.
- 285 Mudlofar. 2012. Analisis Komposisi Minyak Atsiri Fuli Dan biji Pala Papua (*Myristica argentea* Warb) Dengan GC-MS. Fakultas Teknologi Pertanian Institut Pertanian Bogor.
- 286 Muller. 2004. Utekini: A Valley of Bloodshed Springs New Life (or) Pandanus Project: Appropriate Technology in Irian Jaya. Papuaweb. <http://pauweb.org/dlib/tema/amungme/muller/index.html>
- 287 Muller. 2005. The Biodiversity in New Guinea. <http://www.papua.wz.cz/bio2.htm>
- 288 Mulyaningsih & Yamada. 2007. Notes on Some Species of Agarwood in Nusa Tenggara, Celebes and West Papua. in: *Natural Resource Management and Socio-Economic Transformation under the Decentralization in Indonesia: Toward Sulawesi Area Studies*.
- 289 Murtiningrum et al. 2011. Sifat Fisik dan Komposisi Kimia Umbi Dua Spesies Sarang Semut (*Myrmecodia*) Asal Papua. *Jurnal Agrotek* 5 (5): 14 - 19.
- 290 Nega et al. 2003. Eksplorasi Jenis Palem Pada Kawasan Hutan Dataran Rendah Bayeda Distrik Teluk Arguni (Exploration of Species in the Lowland Forest of Bayeda Distract Teluk Arguni). *Beccariana*, 5 (2): 67 - 81.
- 291 Ngutra. 2011. Identifikasi dan analisis ekonomi keanekaragaman hayati tumbuhan Sowang (Tumbuhan Endemik di Pegunungan Cycloops Kabupaten Jayapura Papua). Sekolah pascasarjana institut pertanian Bogor.
- 292 Nick et al. 1995. Biological screening of traditional medicinal plants from Papua New Guinea. *J Ethnopharmacology* 49 147 - 156.
- 293 Nielsen. 1992. Flora Malesiana. Series 1: Volume 11 Part 1.
- 294 Nombo & Leach. 2010. *Reite plants: an ethnobotanical study in Tok Pisin and English*. Book.
- 295 Noor et al. 2012. *Panduan Pengenalan Mangrove di Indonesia*. Book (3rd edition).
- 296 Nootboom & van Welzen. 2013. Flora Malesiana. Series 1: Volume 21.
- 297 Nootboom. 2002. Flora Malesiana. Series 1: Volume 16.
- 298 Nootboom. 2012. Flora Malesiana. Series 2: Volume 4.

- 299 Novotny & Toko. 2014. Ecological research in Papua New Guinean rainforests: insects, plants and people. In: The State of the Forests of Papua New Guinea.
- 300 Nugroho et al. 2015. Traditional Pig farming practices and productivity in the Jayawijaya region, Papua province, Indonesia. *Tropical Animal Health and Production*, 47(3): 495 - 502.
- 301 Nurapriyanto et al. 2005. Sistem pengusahaan beberapa hasil hutan bukan kayu dan alur tataniaganya di Jayapura, Papua. *Penelitian Sosial Ekonomi dan Kebijakan Kehutanan*. Jayapura.
- 302 Ogo et al. 1987. Plant Species Used in Papua New Guinea and Solomon Islands. *Japanese Journal of Tropical Argiculture* 31(1): 16-27.
- 303 Ohtsuka et al. 1987. Sodium-Rich Tree Ash as a Native Salt Source in Lowland Papua. *Economic Botany* 41(1): 55-59.
- 304 Ohtsuka. 1994. Subsistence ecology and carrying capacity in two Papua New Guinea Populations. *Journal of Biosocial Science*, 26, 395 - 407.
- 305 Oomen. 1971. Ecology of Human Nutrition in New Guinea: evaluation of subsistence patterns. *Ecology of Food and Nutrition* 1: 1-16.
- 306 Oyen & Nguyen Xuan Dung (Eds). 1999. *Plant Resources of South-East Asia No. 19 Essential-oil plants*.
- 307 Paisey. 2008. Kajian morfologi dan kimia kayu akway (*Drymis* sp) sebagai afrodisiak endemik Papua. Sekolah pascasarjana institut pertanian Bogor.
- 308 Palupi & Martosupono. 2009. Buah Merah: Potensi Dan Manfaatnya Sebagai Antioksidan (Red fruit: Its Potency and Benefit as Antioxidant). *Jurnal Tumbuhan Obat Indonesia* 2(1): 42-48.
- 309 Pamassangan. 2012. Pentingnya lanskap hutan dan keragaman tumbuhan menurut persepsi masyarakat adat ibele kabupaten jayawijaya. Fakultas Kehutanan Universitas Negeri Papua Manokwari.
- 310 Pangau-Adam & Mühlenberg. 2014. Dispersal of *Terminalia* seeds by the Northern Cassowary in the lowland forest of Papua, Indonesia. *Asian Journal of Conservation Biology*, 3 (2): 115-119.
- 311 Pangau-Adam & Mühlenberg. 2014. Palm Species in the Diet of the Northern Cassowary (*Casuaris unappendiculatus*) in Jayapura Region, Papua, Indonesia. *Palms*, 58(1), 19 - 26.
- 312 Panoff. 1970. Maenge Remedies and Conception of Disease. *Ethnology* 9(1): 68-64.
- 313 Partomihardjo & Rugayah. 1989. Pang (*Pangium edule* reinw.) dan potensinya yang mulai dilupakan (*Pangium edule*, an Almost Forgotten Plant and Its Potential). *Media Konservasi*, 2(2): 45-50.
- 314 Parubak. 2013. Senyawa Flavonoid Yang Bersifat Antibakteri Dari Akway (*Drimys beccariana*. Gibbs). *Chemistry Progress*, 6 (1), 34 - 37.
- 315 Pattiselanno et al. 2004. Preliminary study on traditional pig raising by local communities at upland Kebar, Manokwari, West Papua.
- 316 Pattiselanno et al. 2009. Grazing Habitat of the Rusa Deer (*Cervus timorensis*) in the Upland Kebar, Manokwari. *Biodiversitas*, 10(3), 134 - 138.
- 317 Pattiselanno. 2008. Man-Wildlife interaction: Understanding the concept of conservation ethnics in Papua. *Tiger Paper* 35 (4): 10-12.
- 318 Pelomo et al. 1996. *Canarium* Nut and Oil Marketing in Solomon Islands. in: Stevens, M. L., Bourke, R. M. and Evans, B. R., ed. 1996. South Pacific Indigenous Nuts. Proceedings of a workshop held from 31 October to 4 November 1994 at Le Lagon Resort, Port Vila, Vanuatu. ACIAR Proceedings No. 69, 176 pp. pg. 76 - 78

- 319 Percival & Womersley. 1975. Floristics and Ecology of the Mangrove Vegetation of Papua New Guinea. Book.
- 320 Petir et al. 1997. Useful Plants of Salemben Village, Madang Province, Papua New Guinea. Book.
- 321 Petoe et al. 2018. A monograph of the *Hydriastele wendlandiana* group (Arecaceae: Hydriastele). *Kew Bulletin*, 73 (1), 17.
- 322 Plarre. 1984. Clonal variability in taro in the central highlands of Irian Jaya. In: *Edible Aroids*.pg. 173 - 177
- 323 Plarre. 1995. Review: Evolution and variability of special cultivated crops in the highlands of West New Guinea (Irian Jaya) under present Neolithic conditions. *Plant Genetic Resources Newsletter* 103: 1-13.
- 324 Pleydell. 1970. *Timbers of the British Solomon Islands*. Book.
- 325 Pouwer. 2010. Gender, ritual and social formation in West Papua: A configurational analysis comparing Kamoro and Asmat. Book.
- 326 Powell. 1976. Ethnobotany. In: *New Guinea Vegetation*, Pajmans.
- 327 Powell. 1982. The history of plant use and man's impact on the vegetation. in: *Biogeography and Ecology of New Guinea - Part 2*.
- 328 Prescott et al. 2012. Comparative ethnobotany and in-the-field antibacterial testing of medicinal plants used by the Bulu and inland Kaulong of Papua New Guinea. *Journal of Ethnopharmacology*, 139, 497 - 503.
- 329 Prescott et al. 2015. Medicinal plants of Papua New Guinea's Miu speaking population and a focus on their use of plant-slaked lime mixtures. *J Ethnoph* 174: 217-223.
- 330 Prescott et al. 2017. Tropical ulcer plant treatments use by Papua New Guinea's Apsokok nomads. *J Ethnoph* 205: 240-245.
- 331 Prima. 2002. Studi etnobotani tumbuhan obat masyarakat kamoro di dataran rendah PT Freeport Indonesia, kabupaten Mimika, Papua.
- 332 Priyono. 2008. Potensi antibakteria ekstrak dan fraksi libo (*Piper miniatum* BL). *Berita Biologi*, 9(1): 99-103.
- 333 Purwanto. 2002. Gestion de la biodiversite: relations aux plantes et dynamiques vegetales chez les dani de la vallee de la Baliem en irian jaya, indonesie. *Reinwardtia* 12(1): 1-94.
- 334 Purwanto. 2003. Studi etnoekologi masyarakat dani-baliem dan perubahan lingkungan dilembah baliem, jayawijaya, irian jaya. *Berita Biologi*, 6(5): 661-678.
- 335 Rahawarin. 2017. Non-timber products extracted activities of the upstream Mamberamo basin's traditional communities of West Papua, Indonesia. *Asian Journal of Forestry*, 1 (1), 23 - 26.
- 336 Rahayu. 2011. Hoya Sebagai Tumbuhan Obat. *Warta Kebun Raya*, 11 (1): 15-20.
- 337 Rahayu. 2013. Ekstrak sarang semut (*Hydnophytum formicarum*) dan potensinya sebagai antihiperlipidemia. departemen teknologi hasil perairan fakultas perikanan dan ilmu kelautan institut pertanian Bogor.
- 338 Rali et al. 2007. Volatile Chemical Constituents of *Piper aduncum* L and *Piper gibbilimum* C. DC (Piperaceae) from Papua New Guinea. *Molecules* 12: 389-394.
- 339 Rao. 1996. Antibacterial activity of some medicinal plants of Papua New Guinea. *International Journal of Pharmacognosy* 34 (3): 223-225.
- 340 Rappaport. 1968. *Pigs for the Ancestors: Ritual in the ecology of a New Guinea people*. Yale University Press.
- 341 Rawaharin. 2005. Inventory of palm species in Mioswaar island, Teluk Wondama Regency, West Irian Jaya (Papua). *Biodiversitas* 6(2): 108-112.
- 342 Remetwa. 2012. Kearifan masyarakat lokal kampung rotea dalam pemanfaatan hasil hutan bukan kayu (HHBK) Nabati sebagai bahan makanan dan obat-obatan di distrik bonggo kabupaten sarmi. Jurusan Budidaya Hutan Fakultas Kehutanan Universitas Negeri Papua Manokwari.

- 343 Renyoet et al. 2011. Uji Teratogen Ekstrak Akar Jarong (*Stachytarpheta jamaicensis* (L.) Vahl.) terhadap Sistem Reproduksi Mencit (*Mus musculus* L.) Betina. *Jurnal Biologi Papua* 3(1): 32-38.
- 344 Rezeki et al. 2012. Observasi Klinis Seduhan Serbuk Kulit Batang Kayu Susu (*Alstonia scholaris* (L.) R. Br.) Sebagai Antimalaria Di Manokwari Clinical Observation Of Steeping Powder Milky Wood Cortex (*Alstonia scholaris* (L.) R. Br.) As Antimalarial In Manokwari. *Journal of Pharmaceutics and Pharmacology* 1 (2): 95-103.
- 345 Richards & Suryadi. 2002. Biodiversity Assessment of Yongso - Cyclops Mountains and the Southern Mamberamo Basin, Papua, Indonesia. *RAP Bulletin of Biological Assessment*, 25.
- 346 Richards & Whitmore. 2015. A Rapid Biodiversity Assessment of Papua New Guinea's Hindeburg Wall Region. *Wildlife Conservation Society Papua New Guinea Program*. Goroka, PNG.
- 347 Roham et al. 2010. Antioxidant activity, total phenolic, and total flavonoid of extracts and fractions of red fruit (*Pandanus conoideus* Lam). *International Food Research Journal*, 17, 97 - 106.
- 348 Roreng & Nishigaki. 2013. Buah Merah dan Penduduk Papua. *Warta IHP*, 30 (1), 37 - 48.
- 349 Rumbiak. 2001. Pemanfaatan palem oleh masyarakat etnik Wondama di Tandia Kecamatan Wasior - Manokwari. *Beccariana* 3(2): 31-37.
- 350 Sada et al. 2010. Keragaman Tumbuhan Obat Tradisional di Kampung Nansfori Distrik Supiori Utara, Kabupaten Supiori–Papua. *Jurnal Biologi Papua* 2(2): 39-46.
- 351 Sam et al. 2005. Ethnobotany of Penis Sheaths (Phallicropts) in Papua New Guinea. *Botanical Electronic News*, 490.
- 352 Saragih et al. 2010. The diet of spotted cuscus (*Spiloglossus maculatus*) in natural and captivity habitat. *Nusantara Bioscience* 2 (2): 78-83.
- 353 Saragih. 2008. Kohabitasi Antara Walabi Lincih (*Macropus agilis papuanus* Peters and Doria, 1875) Dan Rusa Timor (*Cervus timorensis* de Blainville, 1822) Di Savana Campuran Udiudi Sptn Iii Taman Nasional Wasur, Papua. Departemen Konservasi Sumberdaya Hutan Dan Ekowisata Fakultas Kehutanan Institut Pertanian Bogor.
- 354 Sari. 2015. Perilaku lek, perilaku harian, dan karakteristik habitat burung hibrida cendrawasih kuning besar (*Paradisaea apoda*) x cendrawasih raggiana (*Paradisaea raggiana*) di taman nasional Wasur Merauke, Papua. Sekolah pascasarjana institut pertanian Bogor.
- 355 Sarimole et al. 2014. Pengobatan penyakit malaria dengan menggunakan beberapa jenis tumbuhan nabati di kabupaten Raja Ampat. *Prosiding seminar nasional Raja Ampat, Waisai – 12 – 13 agustus 2014*.
- 356 Sarimole. 2014. Pemanfaatan tumbuhan hutan sebagai obat tradisional masyarakat di kampung Yenbekwan, distrik Mansuar, kabupaten Raja Ampat. *Prosiding seminar nasional Raja Ampat, Waisai 12–13 agustus 2014*.
- 357 Sarungallo et al. 2016. Nutrient content of three clones of red fruit (*Pandanus conoideus*) during the maturity development. *International Food Research Journal*, 23 (3), 1217 - 1225.
- 358 Saulei & Aruga. 1994. The status and prospects of non-timber forest products development in Papua New Guinea. *The Commonwealth Forestry Review*, 73(2), 97 - 105.
- 359 Sawan. 2014. Potensi tanaman obat banondit (*Biophytum petersianum* Klotzsch) sebagai sumber pakan hijauan di lembah kebar Papua Barat. *Pastura* 2(1): 34-36.
- 360 Sawen. 2011. Pengamatan Ekologi Padang Rumput Alam Kebar Papua Dan Uji Produktivitas Banondit (*Biophytum petersianum* Klotzsch) Melalui Pemberian Nitrogen Dan Interval Defoliiasi. *Sekolah Pascasarjana Institut Pertanian Bogor*.

- 361 Schmid. 1991. *Of People and Plants: A Botanical Ethnography of Nokopo Village, Madang and Morobe Provinces, Papua New Guinea*. Book: Ethnologisches Seminar der Universität und Museum für Völkerkunde Basal.
- 362 Schneider & Yaku. 1996. Conservation for development: the relevance of indigenous rootcrop knowledge in Irian Jaya In: *Into Action Research: Partnerships in Asian Rootcrop Research and Development*.
- 363 Seebaluck et al. 2015. Medicinal plants from the genus *Acalypha* (Euphorbiaceae) - A review of their ethnopharmacology and phytochemistry. *Journal of Ethnopharmacology*, 159, 137 - 157.
- 364 Sembori. 2009. Inventarisasi Jenis Tumbuhan Pangan Lokal pada Masyarakat Ambaidiru Distrik Kosiwo, Kabupaten Yapen Waropen. *Jurnal Biologi Papua* 1(1): 36-41.
- 365 Setyawan. 2009. Traditionally utilization of *Selaginella*; field research and literature review. *Bioscience* 1(3): 146-158.
- 366 Sheil et al. 2004. Building capacity for Multidisciplinary Landscape Assessment in Papua: three phases of training and pilot assessments in the Mamberamo Basin. Center for International Forestry Research, Conservation International (Papua Program), Lembaga Ilmu Pengetahuan Indonesia (LIPI).
- 367 Siarudin et al. 2016. Potensi produksi daun dan minyak kayu putih jenis *Asteromyrtus symphyocarpa* di Taman Nasional Wasur. *Jurnal Hutan Tropis* 1(3): 1-7.
- 368 Siemonsma & Piluek (Eds.). 1993. *Plant Resources of South-East Asia No. 8 Vegetables*. Book.
- 369 Sillitoe. 1980. Confusions in the classifications: How the Wola name their plants. *Ethnos* 45 (3-4): 133-156.
- 370 Sillitoe. 1983. *Roots of the earth: Crops in the Highlands of Papua New Guinea*. Book.
- 371 Sillitoe, P. 1995. An ethnobotanical account of the plant resources of the Wola region, Southern Highlands Province, Papua New Guinea. *Journal of Ethnobiology* 15: 201-236.
- 372 Sillitoe. 2002. Archaic Crop or Awkward Crop? Taro Cultivation in the Southern Highlands Province of Papua New Guinea. *JCAS Symposium Series* 16, 165 - 194.
- 373 Sillitoe. 2003. The Gender of Crops in the Papua New Guinea Highlands.in: Howard (2003) *Women and Plants. Gender Relations in Biodiversity Conservation and Management*. London, Zed Books. Chapter 9
- 374 Simaremare. 2014. Skrining Fitokimia Ekstrak Etanol Daun Gatal (*Laportea decumana* (Roxb.) Wedd). *Pharmacy*, 11 (1), 98 - 107.
- 375 Simbiak. 2007. *The Marantaceae Petersen in Western New Guinea*. Department of Biology The Graduate School Bogor Agricultural University.
- 376 Sinery. 2006. Jenis Kuskus di Taman Wisata Gunung Meja Kabupaten Manokwari, Irian Jaya Barat. *Biodiversitas*, 7 (2), 175 - 180.
- 377 Sinery. 2012. The population condition and availability of feed of cuscus in the Arfak Mountain Nature Reserve, West Papua. *Biodiversitas* 13 (2): 86 - 91.
- 378 Sinery. 2013. Population dynamics of cuscus in tourist island of Ahe, District of Nabire, Papua. *Biodiversitas*, 14 (2), 95 - 100.
- 379 Sirami. 2010. Marero (*Lumnitzera littoralis*) Kayu Adat Orang TAMAKURI. *Lahan Basah*, 18 (1), 20 - 21.
- 380 Sirami. 2010. Pohon Buah Hitam (*Haplolobus* spp.) Apa Keistimewaannya bagi Masyarakat Pesisir Teluk Wondama?. *Warta Konservasi Lahan Basah (Wetlands International)*, 18 (2), 20 - 21.
- 381 Sirami. 2014. Maighian [*Toona sureni* (Blume) Merr.] Kayu Perahu Nomor Satu Orang Waropen Bagian. *Warta Konservasi Lahan Basah (Wetlands International)*, 22 (2), 13 - 14.
- 382 Siri von Reis Altschul. 1973. *Drugs and foods from little-known plants*. Harvard University Press.
- 383 Sitepu et al. 2011. *Fragrant wood Gaharu: When the wild can no longer provide*. Ministry of Forestry on Indonesia in Cooperation with International Tropical Timber Organisation.

- 384 Sitorus. 1997. Analisa pemanfaatan bambu di daerah transmigrasi desa margorukun kecamatan oransbari kabupaten manokwari. Jurusan Kehutanan Program Studi Manajemen Hutan, Fakultas Pertanian Universitas Cenderawasih, Manokwari.
- 385 Skingle. 1970. Some Medicinal Herbs Used by the Natives of New Guinea. *Mankind*, 7(3), 223 - 225.
- 386 Smith. 1996. People-plant interactions in the New Guinea highlands: agricultural heartland or horticultural backwater?. in: The origins and spread of agriculture and pastoralism in Eurasia (Harris, 1996).
- 387 SMK Forestry Students. 2014. Bahan Pewarna Alami Kayu Asal Kampungbenti Distrik Minyambouw Kabupaten Manokwari.
- 388 Snow. 2012. Five new species of *Rhodamnia* (Myrtaceae, Myrteae) from New Guinea. *PhytoKeys*, 19, 31 - 49.
- 389 Soares et al. 2005. Medicinal Plants with Inhibitory Properties Against Snake Venoms. *Current Medicinal Chemistry* 12: 2625-2641.
- 390 Soeksmanto et al. 2010. Anticancer Activity Test for extracts of Sarang Semut Plant (*Myrmecodya pendens*) to HeLa and MCM-B2 Cells. *Pakistan Journal of Biological Sciences*, 13 (3), 148 - 151.
- 391 Soerianegara & Lemmens (Eds.). 1993. Plant Resources of South-East Asia No. 5(1) Timber trees: Major commercial timbers. Book.
- 392 Sosef et al. 1998. Plant Resources of South-East Asia No. 5 (3) Timber trees: Lesser-known timbers. Book.
- 393 SP3T. 2016. Tumbuhan Obat Tradisional Papua Berdasarkan Kearifan Lokal Masyarakat. Dinas Kesehatan Provinsi Papua Sentra Pengembangan Dan Penerapan Pengobatan Tradisional (Sp3t).
- 394 Stewart & Strathern. 2002. The Cultivation and Use of Taro and Fruit Pandanus among the Duna of the Aluni Valley in the Southern Highlands Province of Papua New Guinea, with Comparative Notes. *JCAS Symposium Series* 16, 233 - 245.
- 395 Stöcklin. 1986. Plants in traditional medicine: medical concepts of the Abelam people in Papua New Guinea: short communication. *Acta Tropica* 43: 187-189.
- 396 Stone. 1984. Pandanus from Ok Tedi Region, Papua New Guinea, Collected by Debra Donoghue. *Economic Botany*, 38(3): 304-313.
- 397 Stopp. 1963. Medicinal Plants of the Mt. Hagen People (Mbowamb) in New Guinea. *Economic Botany* 17(1): 16-22.
- 398 Suharno et al. 2015. Usaha Domestifikasi Tumbuhan Pokem (*Setaria Italica* (L.) Beauv) Masyarakat Lokal Pulau Numfor, Kabupaten Biak Numfor Sebagai Upaya Menunjang Ketahanan Pangan Nasional (The Effort of Domestication of Pokem (*Setaria italica* (L.) Beauv) by Local Communities at Numfor Island, Biak Numfor Regency in Supporting National Food Security). *Jurnal Manusia dan Lingkungan* 22 (1): 73-83.
- 399 Suharno. 2016. Wati (*Piper methysticum*) medicinal plant: The ethnobiological and ethnomedicinal values of the Marind tribe in Merauke, Papua, Indonesia. *Biodiversitas* 17 (2): 814 - 822.
- 400 Suma. 2001. Pemanfaatan jenis tumbuhan pohon oleh suku Wondama di desa Tandia, Wasior Kabupaten Manokwari. *Beccariana* 3(2): 19-30.
- 401 Susanti. 2016. Inventarisasi Tumbuhan Sarang Semut di Kabupaten Fakfak, Papua Barat (The Inventory of Ant-plant in Fakfak, Papua Barat). Departemen Biologi Fakultas Matematika Dan Ilmu Pengetahuan Alam Institut Pertanian Bogor.
- 402 Susiarti. 2003. Use of Plants in Muyu Community at Soa Village and Its Surroundings, Merauke, Papua. *Benta Biologi* 6(5): 705-711.
- 403 Susiarti. 2005. Jenis-Jenis Pengganti Pinang dan Gambir dalam Budaya Menginang Masyarakat di Kawasan Taman Nasional Wasur, Merauke, Papua. *Biodiversitas*, 6 (3), 217 - 219.

- 404 Sutarno. 2001. Tumbuhan Penghasil Warna Alami Dan Pemanfaatannya Dalam Kehidupan Suku Meyah Di Desa Yoom Nuni, Manokwari. Jurusan Kehutanan, Fakultas Pertanian, Universitas Negeri Cenderwasih, Manokwari.
- 405 Sutarno. 2009. Autekologi *Begonia* Spp. (Begoniaceae) Manfaatnya Bagi Suku Arfak Di Daerah Mokwam Manokwari. Sekolah Pascasarjana Institut Pertanian Bogor.
- 406 Syahravi. 2008. Studi Pemanfaatan Sarang Semut (*Myrmecodia pendans* Merr. & Perry) Oleh Masyarakat Sekitar Taman Nasional Wasur. Departemen Konservasi Sumberdaya Hutan Dan Ekowisata Fakultas Kehutanan Institut Pertanian Bogor.
- 407 Takeuchi & Golman. 2002. The Identity of Eaglewood (*Gryinops*, Thymelaeaceae), A New Economic Resource for Papua New Guinea. *Sida* 20 (1): 261-267.
- 408 Takeuchi. 2000. A Floristic and Ethnobotanical Account of the Josephstaal Forest Management Agreement Area, Papua New Guinea. *Sida Contributions to Botany* 19 (1): 1-63.
- 409 Telban. 1988. The role of medical ethnobotany in ethnomedicine: A New Guinea example. *J Ethnobiol* 8(2): 149-169.
- 410 Thaman. 1992. The Ethnobotany of Pacific Island Coastal Plants. *Science of Pacific Island peoples*, 3: 147-184.
- 411 Thomas. 2000. Psychoactive Plant Use In Papua New Guinea: A Review. *Science in New Guinea*, 25 (1): 33-59.
- 412 Thomas. 2003. The Psychoactive Flora of Papua New Guinea. *Journal of Psychoactive Drugs* 35 (2): 285-293.
- 413 Thomas. 2006. Galbulimima bark and ethnomedicine in Papua New Guinea. *Papua New Guinea Medical Journal* 49 (1-2): 57-59.
- 414 Tirajoh et al. 2012. Nutrient Composition of Two Different Varieties Of Foxtail Millet (*Setaria italica* Sp.) And Their Potential Use As Poultry Feed Ingredient. *International Conference On Livestock Production And Veterinary Technology*.
- 415 Triantoro et al. 2008. Keanekaragaman Jenis Flora Pada Cagar Alam Pegunungan Yapen Tengah, Provinsi Papua (Biodiversity of Flora in Central Yapen Mountain Range Nature Reserve, Papua Province). *Info Hutan*, 5 (1), 25 - 34.
- 416 Triestini. 2000. Pemanfaatan jenis kayu oleh masyarakat ambai sebagai bahan baku komponen bangunan rumah berlabuh. Jurusan Kehutanan, Fakultas Pertanian, Universitas Cenderwasih, Manokwari.
- 417 Trudgen & Baker. 2008. A revision of the *Heterospatha elegans* (Arecaceae) complex in New Guinea. *Kew Bulletin* 63: 639-647.
- 418 Tsuji et al. 2011. Biological and Ethnobotanical Characteristics of Nipa Palm (*Nypa fructicans* Wurmb.): A Review. *Sains Malaysiana* 40(12): 1407-1412.
- 419 Turnbull et al. 1983. Seed Collections of Tropical Acacias In Indonesia, Papua New Guinea and Australia. *Forest Genetic Resources Information* 12: 2-15.
- 420 Turot et al. 2016. Potensi Pemanfaatan Tumbuhan Paku *Diplazium esculentum* Swartz (Studi Kasus) Di Kampung Ayawasi, Distrik Aifat Utara, Kabupaten Maybrat, Provinsi Papua Barat. *Agri-SosioEkonomi Unsrat*, 12 (3), 1 - 10.
- 421 Tutuop et al. 2009. Upaya Pemanfaatan Ekstrak Biji Keben *Barringtonia asiatica* (L.) Kurz terhadap Kematian Kutu Tempurung Hijau *Coccus viridis* pada Tanaman Kopi *Coffea* sp. *Jurnal Biologi Papua*, 1(2), 51 - 57.
- 422 Uji. 2005. Keanekaragaman Dan Potensi Flora Di Cagar Alam Pegunungan Cyclops, Papua. *Jurnal Teknologi Lingkungan* 6(3): 485-495.
- 423 Uji. 2007. Review: Keanekaragaman Jenis Buah-Buahan Asli Indonesia dan Potensinya (Species diversity of indigenous fruits in Indonesia and its potential). *Biodiversitas*, 8 (2), 157 - 167.
- 424 Umezaki et al. 1999. Diet among the Huli in Papua New Guinea Highlands When They Were Influenced by The Extended Rainy Period. *Ecology of Food and Nutrition* 37: 409-427.

- 425 Ungirwalu et al. 2016. Pengelolaan Adaptif Pemanfaatan Buah Hitam (*Haplolobus monticola* Blumea) Etnis Wandamen-Papua (Adaptive Management Utilization of Black Fruit (*Haplolobus monticola* Blumea) Ethnic Wandamen-Papua). *Jurnal Manusia dan Lingkungan*, 23 (2), 266 - 275.
- 426 Ungirwalu et al. 2016. The ethno-techno-conservation approach in the utilization of Black Fruit (*Haplolobus* sp.) by the Wandamen ethnic of Papua, Indonesia. *Biodiversitas*, 18 (4), 1336 - 1343.
- 427 UNIPA. 2006. Pemerintah Kabupaten Waropen. online. <https://www.waropenkab.go.id/potensi-daerah/hasil-mangrove>
- 428 Utteridge. 2011. A revision of the genus *Medusanthera* (Stemonuraceae, Icacinaceae s.l.). *Kew Bulletin*, 66, 49 - 81.
- 429 van der Vossen & Umali (Eds). 2001. *Plant Resources of South-East Asia No. 14 Vegetable oils and fats*. Book.
- 430 van der Vossen & Wessel (Eds.). 2000. *Plant Resources of South-East Asia No. 16 Stimulants*. Book.
- 431 Van Heist et al. 2015. Exploring Local Perspectives for Conservation Planning: A Case Study from a Remote Forest Community in Indonesian Papua. *Forests*, 6, 3278 - 3303.
- 432 van Royen. 1957. Revision of the Sapotaceae of the Malaysian area in a wider sense. VII: *Planchonella*. *Blumea* 8(2): 235-437.
- 433 van Steenis. 1948. *Flora Malesiana*. Series 1: Volume 4.
- 434 van Steenis. 1955. *Flora Malesiana*. Series 1: Volume 5.
- 435 van Steenis. 1960. *Flora Malesiana*. Series 1: Volume 6 Part 1.
- 436 van Steenis. 1962. *Flora Malesiana*. Series 1: Volume 6 Part 2.
- 437 van Steenis. 1964. *Flora Malesiana*. Series 1: Volume 6 Part 3.
- 438 van Steenis. 1971. *Flora Malesiana*. Series 1: Volume 7 Part 1.
- 439 van Steenis. 1972. *Flora Malesiana*. Series 1: Volume 7 Part 2.
- 440 van Steenis. 1974. *Flora Malesiana*. Series 1: Volume 7 Part 3.
- 441 van Steenis. 1976. *Flora Malesiana*. Series 1: Volume 7 Part 4.
- 442 van Steenis. 1977. *Flora Malesiana*. Series 1: Volume 8 Part 2.
- 443 van Steenis. 1978. *Flora Malesiana*. Series 1: Volume 8 Part 3.
- 444 van Steenis. 1979. *Flora Malesiana*. Series 1: Volume 9.
- 445 van Steenis. 1984. *Flora Malesiana*. Series 1: Volume 10 Part 1.
- 446 van Steenis. 1986. *Flora Malesiana*. Series 1: Volume 10 Part 2.
- 447 van Steenis. 1988. *Flora Malesiana*. Series 1: Volume 10 Part 3.
- 448 van Steenis. 1989. *Flora Malesiana*. Series 1: Volume 10 Part 4.
- 449 van Steenis. 1993. *Flora Malesiana*. Series 1: Volume 11 Part 2.
- 450 van Valkenburg & Bunyapraphatsara (Eds). 2001. *Plant Resources of South-East Asia No. 12(2) Medicinal and poisonous plants 2*.
- 451 Verdcourt. 1979. *A manual of New Guinea Legumes*. Book.
- 452 Vink. 2002. Some Malesian species of *Pouteria* (Sapotaceae). *Blumea* 47: 95-147.
- 453 Wahyudi et al. 2012. Berberine in the Medicinal Plant of Tali kuning (*Tinospora dissitiflora* Diels). *Wood Research Journal* 2(2): 100-104.
- 454 Wahyudi. 2013. *Buku Pegangan Hasil Hutan Bukan Kayu*. Book.
- 455 Wahyudi. 2014. Pemanfaatan Vegetasi Mangrove sebagai Obat-obatan Tradisional pada Lima Suku di Papua (Utilization of Mangrove Vegetation as Tradisional Medicines for Five Ethnic Groups in Papua). *Biota* 19(1):1-8.

- 456 Wahyudi. 2017. Non-Timber Forest Product (NTFP) Commodities Harvested and Marketed by Local People at the Local Markets in Manokwari - West Papua. *Indonesian Journal of Forestry Research*, 4 (1), 27 - 35.
- 457 Walujo et al. 2007. Ethnotaxonomical Study on the Red Pandan (*Pandanus conoideus* Lamarck) in order to Correlate the Local Wisdom and Scientific Thought. *Berita Biologi*, 8 (5), 391 - 404.
- 458 Wanma et al. 2013. Ethnobotanical aspect of Noken: Case Study in the High Mountain Indigenous community of Papua Island, Indonesia. *Indian Journal of Traditional Knowledge* 12(2), 202 - 208.
- 459 Waterhouse. 2003. Know your enemy: recent records of potentially serious weeds in northern Australia, Papua New Guinea and Papua (Indonesia). *Telopea* 10 (1): 477-485.
- 460 Watson. 1964. A Previously Unreported Root Crop from the New Guinea Highlands. *Ethnology* 3(1):1-5.
- 461 Watson. 1965. From Hunting to Horticulture in the New Guinea Highlands. *Ethnology*, 4(3), 295 - 309.
- 462 Watson. 1968. Pueraria: Names and Traditions of a Lesser Crop of the Central Highlands, New Guinea. *Ethnology*, 7(3), 268 - 279.
- 463 Westphal & Jansen (Eds.). 1989. *Plant Resources of South-East Asia: A Selection*. Book.
- 464 Weya. 2010. Pemanfaatan Tanaman Lilin (*Setaria palmifolia*) Sebagai Obat Tradisional Dalam Kehidupan Beberapa Suku Di Kabupaten Puncak Jaya Provinsi Papua). <http://sayurlilin.blogspot.co.uk/2010/09/pemanfaatan-tanaman-sayur-lilin-setaria.html>.
- 465 Widya et al. 2015. Ethnobotany and Conservation of Ketimunan/Timonius timon (Spreng.) Merr. In *Local Communities of Kanume Tribe in Wasur National Park, Papua*. *Media Konserasi*, 20(2): 149-158.
- 466 Widya. 2015. Bioekologi, Etnobotani Dan Konservasi Ketimunan/ Timonius timon (Spreng.) Merr. Pada Masyarakat Lokal Suku Kanume Di Taman Nasional Wasur Papua. Sekolah Pascasarjana Institut Pertanian Bogor.
- 467 Widyastuti et al. 2002. Dani Women's Knowledge on and its contribution to maintenance of sweet potato diversity in Baliem Valley. Exploring the Complementarities of In Situ and Ex Situ Conservation Strategies for Asian Sweetpotato. *Genetic Resources* 150-158.
- 468 Wihel. 2015. Komposisi Flora Mangrove Di Pantai Sungai Gamta, Distrik Misool Barat, Kabupaten Raja Ampat. *Prosiding Seminar Nasional Raja Ampat Waisai 13 - 13 Agustus 2014*.
- 469 Wijaya & Pohon. 2009. Kajian Teknis Standar Minyak Buah Merah (*Pandanus conoideus* Lam). *Prosiding PPI Standardisasi*.
- 470 Wilujeng & Simbiak. 2015. Karakterisasi morfologi *Xanthostemon novoguineensis* Valetton (Myrtaceae) dari Papua. *Prosiding Seminar Nasional Masyarakat Biodiversitas Indonesia* 1(3): 466-471.
- 471 Winara & Mukhtar. 2016. Pemanfaatan Tumbuhan Obat Oleh Suku Kanum Di Taman Nasional Wasur, Papua (Utilization of Medicinal Plants by Kanum Tribe in Wasur National Park, Papua). *Jurnal Penelitian Hutan dan Koservasi Alam* 13(1): 57-72.
- 472 Winara et al. 2017. Keanekaragaman Jenis Tumbuhan Pada Hutan Kayu Putih Dan Pemanfaatannya Oleh Masyarakat Setempat Di Taman Nasional Wasur, Papua (Diversity of Plant Species on Cajuput Forest and Its Utilizations by Local People in Wasur National Park, Papua). *Jurnal Penelitian Hutan dan Koservasi Alam* 14 (1): 1-19.
- 473 Wiriadinata et al. 1992. *Plants and Flowers of Baliem Valley Jayawijaya*. Book: Research and Development Centre For Biology, Indonesian Institute of Sciences.
- 474 Wiriadinata et al. 2016. Notes on Malesian Fabaceae (Leguminosae-Papilionoideae) 16. The Genus *Mucuna*. *Blumea*, 61, 90 - 124.
- 475 Wiriadinata. 1995. Ethnobotany of Economic Plants in the Baliem Valley, Jayawijaya, Irian Jaya. In: Schneider, J. ed. *Indigenous Knowledge in Conservation of Crop Genetic Resources, Proceedings of an International Workshop held in Cisarua, Bogor, Indonesia January 30-February 3, 1995*. Bogor, CIP-ESEAP/CRIFC, pp. 87-98.

- 476 Wiriadinata. 2009. Medicinal plants of Wamena, Jaya Wijaya Papua Indonesia. In: 2009 International Biodiversity Conference in Papua.
- 477 Womersley. 1978. Handbooks of the Flora of Papua New Guinea Volume 1. Melbourne University Press, Carlton South, Victoria.
- 478 Woodley. 1991. Medicinal Plants of Papua New Guinea Part 1: Morobe Province. Book.
- 479 Woretma. 2013. Keanekaragaman Tumbuhan Pangan dan Obat pada Masyarakat Suku Mbaham Mata di Kampung Werabuan, Kabupaten Fakfak (Food and Medicinal Plant Diversity, in Mbaham Mata Tribe Society In Werabuan Village, Fakfak District). Departemen Konservasi Sumberdaya Hutan Dan Ekowisata Fakultas Kehutanan Institut Pertanian Bogor.
- 480 World Health Organisation. 2009. Medicinal Plants in Papua New Guinea. Book.
- 481 Yansip et al. 2017. Jenis-Jenis Tumbuhan Berkhasiat Obat Tradisional Di Masyarakat Desa Yanim Dan Braso Distrik Kentuk Gresi Kabupaten Jayapura (The Kind Of Plants To Use As Traditional Medicine For People Who Live At Village Of Yanim And Braso, District Of Kentuk Gresi Of Jayapura Regency). Jurnal Biologi Makassar, 2 (2), 1 - 11.
- 482 Yarman & Damayanti. 2012. Pemanfaatan Dan Upaya Konservasi Kayu Putih (*Asteromyrtus symphyocarpa*) Di Taman Nasional Wasur. Media Konserasi 17 (2): 85-93.
- 483 Yazan & Armania. 2014. *Dillenia* species: A Review of the traditional uses, active constituents and pharmacological properties from pre-clinical studies. Pharmaceutical Biology 52 (7): 890-897.
- 484 Yewen et al. 2008. Struktur Komunitas Dan Penyebaran Mangrove Serta Upaya Pengelolaannya Oleh Masyarakat Distrik Teminabuan, Kabupaten Sorong Selatan. In Prosiding Konferensi Nasional VI Pengelolaan Sumberdaya Pesisir dan Lautan tanggal 26 – 29 Agustus 2008 di Manado, 305–319.
- 485 Yoshinaga. 1991. Dietary selenium intake of the Gidra, Papua New Guinea. Ecology of Food and Nutrition, 26 (1), 27 - 36.
- 486 Zebua. 2016. Pengetahuan Tradisional Masyarakat Papua dalam Mengenali, Mengklasifikasi dan Memanfaatkan Pandan Buah Merah (*Pandanus conoideus* Lam.). Jurnal Biologi Papua 8(1): 23-37.
- 487 Zona. 2005. A Revision of *Ptychococcus* (Arecaceae). Systematic Botany, 30 (3), 520 - 529.
- 488 Zumbroich. 2011. To Strengthen the Teeth and Harden the Gums - Teeth blackening as medical practice in Asia, Micronesia and Melanesia. Ethnobotany Research & Applications 9: 97-113.
